# Supplementary material for: Circuit mechanisms encoding odors and driving aging-associated behavioral declines in Caenorhabditis elegans
Source: PubMed Central journal article supplement (PMC4577979; doi:10.7554/elife.10181), 2015-09-22
Supplement: elife10181s020.pdf [file elife10181s020.pdf]

**Supplementary file 1. *C. elegans* strain list.**

| Strain                                          | Genotype                                                         | Name and Figures                                                                                                                                                                                                                                                                                                                                 |
|-------------------------------------------------|------------------------------------------------------------------|--------------------------------------------------------------------------------------------------------------------------------------------------------------------------------------------------------------------------------------------------------------------------------------------------------------------------------------------------|
| <b>Calcium imaging: wild-type GCaMP strains</b> |                                                                  |                                                                                                                                                                                                                                                                                                                                                  |
| CX10536                                         | <i>kyEx2595 [str-2::GCaMP2.2b, unc-122::gfp]</i>                 | "AWC <sup>ON</sup> " in Figures 1,5 and Figure 1–figure supplement 1, Figure 5–figure supplements 1-4. "WT" in Figure 3A and Figure 4–figure supplement 1A-C. Also used for all conditions in Figure 2A.                                                                                                                                         |
| PS6253                                          | <i>pha-1(e2123) III; syEx1238 [srsx-3::GCaMP3, pha-1::pha-1]</i> | "AWC <sup>OFF</sup> " in Figure 1, Figure 1–figure supplement 1. "WT" in Figure 3–figure supplement 1A                                                                                                                                                                                                                                           |
| IV388                                           | <i>ueEx7 [gcy-7::GCaMP3, unc-122::gfp]</i>                       | "ASEL" in Figures 1,5 and Figure 1–figure supplement 1, Figure 5–figure supplements 1-4. "WT" in Figures 3C, 4A-D and 6B,F and Figure 3–figure supplement 1C, Figure 5–figure supplement 5A,E and Figure 6–figure supplement 1A-C. Also used for all conditions in Figure 2C and Figure 5–figure supplement 5C,G.                                |
| IV28                                            | <i>ueEx10 [gcy-5::GCaMP3, unc-122::gfp]</i>                      | "ASER" in Figure 1, Figure 1–figure supplement 1. "WT" in Figure 3–figure supplement 1B                                                                                                                                                                                                                                                          |
| PY6554                                          | <i>oyEx [gpa-4::GCaMP2.2b, unc-122::dsRed]</i>                   | "AWA" in Figures 1 and 5 and Figure 1–figure supplement 1, Figure 5–figure supplements 1,3. "WT" in Figure 3B and Figure 4–figure supplement 1E,F. "ASI" in Figure 1 and Figure 1–figure supplement 1. Also used for all conditions in Figure 2B.                                                                                                |
| PY7336                                          | <i>oyEx [str-1::GCaMP3, unc-122::dsRed]</i>                      | "AWB" in Figures 1 and 5 and Figure 1–figure supplement 1, Figure 5–figure supplements 1-4. "WT" in Figures 3D,4E,4F,7B,7E and Figure 3–figure supplement 1D, Figure 4–figure supplement 1D, Figure 5–figure supplement 5B,F and Figure 7–figure supplement 1A-C. Also used for all conditions in Figure 2D and Figure 5–figure supplement 5D,H. |

|                                                                         |                                                                                                  |                                                                               |
|-------------------------------------------------------------------------|--------------------------------------------------------------------------------------------------|-------------------------------------------------------------------------------|
| IV346                                                                   | <i>kyEx2865 [sra-6::GCaMP3, unc-122::gfp]</i>                                                    | "ASH" in Figure 1, Figure 1–figure supplement 1, Figure 5–figure supplement 3 |
| CX10981                                                                 | <i>kyEx2866 [sra-9::GCaMP2.2b, unc-122::gfp]</i>                                                 | "ASK" in Figure 1, Figure 1–figure supplement 1                               |
| IV413                                                                   | <i>ueEx254 [srh-142::GCaMP3, unc-122::gfp]</i>                                                   | "ADF" in Figure 1, Figure 1–figure supplement 1                               |
| CX12022                                                                 | <i>kyEx3290 [sre-1::GCaMP3, unc-122::dsRed]</i>                                                  | "ADL" in Figure 1, Figure 1–figure supplement 1                               |
| IV69                                                                    | <i>oyEx [gcy-8::GCaMP3, unc-122::rfp]</i>                                                        | "AFD" in Figure 1, Figure 1–figure supplement 1                               |
| OF977                                                                   | <i>ixEx196 [ops-1::GCaMP3, lin-44::rfp]</i>                                                      | "ASG" in Figure 1, Figure 1–figure supplement 1                               |
| ZD1184                                                                  | <i>qdEx103 [trx-1::GCaMP5, unc-122::gfp]</i>                                                     | "ASJ" in Figure 1, Figure 1–figure supplement 1                               |
| <b>Calcium imaging: mutant, rescue and overexpression GCaMP strains</b> |                                                                                                  |                                                                               |
| IV15                                                                    | <i>unc-13(e51) I; kyEx2595 [str-2::GCaMP2.2b, unc-122::gfp]</i>                                  | " <i>unc-13</i> " in Figure 3A                                                |
| IV23                                                                    | <i>unc-31(e928) IV; kyEx2595 [str-2::GCaMP2.2b, unc-122::gfp]</i>                                | " <i>unc-31</i> " in Figure 3A                                                |
| IV141                                                                   | <i>unc-13(e51) I; pha-1 (e2123) III; syEx1238 [srsx-3::GCaMP3, pha-1::pha-1]</i>                 | " <i>unc-13</i> " in Figure 3–figure supplement 1A                            |
| IV44                                                                    | <i>unc-31(e928) IV; pha-1 (e2123) III; syEx1238 [srsx-3::GCaMP3, pha-1::pha-1]</i>               | " <i>unc-31</i> " in Figure 3–figure supplement 1A                            |
| IV244                                                                   | <i>unc-13(e51) I; oyEx [gpa-4::GCaMP2.2b, unc-122::dsRed]</i>                                    | " <i>unc-13</i> " in Figure 3B                                                |
| IV234                                                                   | <i>unc-31(e928) IV; oyEx [gpa-4::GCaMP2.2b, unc-122::dsRed]</i>                                  | " <i>unc-31</i> " in Figure 3B                                                |
| IV104                                                                   | <i>unc-13(e51) I; ueEx7 [gcy-7::GCaMP3, unc-122::gfp]</i>                                        | " <i>unc-13</i> " in Figure 3–figure supplement 1C                            |
| IV22                                                                    | <i>unc-31(e928) IV; ueEx7 [gcy-7::GCaMP3, unc-122::gfp]</i>                                      | " <i>unc-31</i> " in Figure 3C                                                |
| IV54                                                                    | <i>unc-31(e928) IV; ueEx7 [gcy-7::GCaMP3, unc-122::gfp]; kyEx875 [odr-3::unc-31, elt-2::gfp]</i> | " <i>unc-31</i> ; <i>AWC::unc-31</i> " in Figure 3C                           |
| IV68                                                                    | <i>unc-13(e51) I; ueEx10 [gcy-5::GCaMP3, unc-122::gfp]</i>                                       | " <i>unc-13</i> " in Figure 3–figure supplement 1B                            |
| IV32                                                                    | <i>unc-31(e928) IV; ueEx10 [gcy-5::GCaMP3, unc-122::gfp]</i>                                     | " <i>unc-31</i> " in Figure 3–figure supplement 1B                            |
| IV383                                                                   | <i>unc-13(e51) I; oyEx [str-1::GCaMP3, unc-122::dsRed]</i>                                       | " <i>unc-13</i> " in Figure 3D                                                |
| IV381                                                                   | <i>unc-31(e928) IV; oyEx [str-1::GCaMP3, unc-122::dsRed]</i>                                     | " <i>unc-31</i> " in Figure 3–figure supplement 1D                            |
| IV193                                                                   | <i>ins-1(nr2091) IV; ueEx7 [gcy-7::GCaMP3,</i>                                                   | " <i>ins-1</i> " in Figure 4A                                                 |

|         |                                                                                                                                        |                                                               |
|---------|----------------------------------------------------------------------------------------------------------------------------------------|---------------------------------------------------------------|
|         | <i>unc-122::gfp</i>                                                                                                                    |                                                               |
| IV245   | <i>ins-1(nr2091) IV; ueEx7 [gcy-7::GCaMP3, unc-122::gfp]; ueEx152 [odr-3::ins-1::sl2mCherry, unc-122::rfp]</i>                         | " <i>ins-1; AWC::ins-1</i> " in Figure 4A                     |
| IV634   | <i>ins-1(nr2091) IV; ueEx7 [gcy-7::GCaMP3, unc-122::gfp]; ueEx428 [gpa-4deletion::ins-1::sl2mCherry, unc-122::rfp]</i>                 | " <i>ins-1; AWA::ins-1</i> " in Figure 4A                     |
| IV655   | <i>ueEx7 [gcy-7::GCaMP3, unc-122::gfp]; ueEx448 [odr-3::ins-1 sense::sl2mCherry, odr-3::ins-1 antisense::sl2mCherry, unc-122::rfp]</i> | " <i>AWC::ins-1 RNAi</i> " in Figure 4B,G                     |
| CX10926 | <i>ins-1(nr2091) IV; kyEx2595 [str-2::GCaMP2.2b, unc-122::gfp]</i>                                                                     | " <i>ins-1</i> " in Figure 4–figure supplement 1A             |
| IV172   | <i>daf-2(e1370) III; ueEx7 [gcy-7::GCaMP3, unc-122::gfp]</i>                                                                           | " <i>daf-2</i> " in Figure 4C                                 |
| IV224   | <i>daf-2(e1370) III; ueEx7 [gcy-7::GCaMP3, unc-122::gfp]; ueEx139 [gcy-7::daf-2::sl2mCherry, unc-122::rfp]</i>                         | " <i>daf-2; ASEL::daf-2</i> " in Figure 4C                    |
| IV175   | <i>daf-2(e1370) III; kyEx2595 [str-2::GCaMP2.2b, unc-122::gfp]</i>                                                                     | " <i>daf-2</i> " in Figure 4–figure supplement 1B             |
| IV96    | <i>age-1(hx546) II; ueEx7 [gcy-7::GCaMP3, unc-122::gfp]</i>                                                                            | " <i>age-1</i> " in Figure 4D                                 |
| IV114   | <i>age-1(hx546) II; ueEx7 [gcy-7::GCaMP3, unc-122::gfp]; ueEx54 [gcy-7::age-1::sl2mCherry, unc-122::rfp]</i>                           | " <i>age-1; ASEL::age-1</i> " in Figure 4D                    |
| IV98    | <i>age-1(hx546) II; kyEx2595 [str-2::GCaMP2.2b, unc-122::gfp]</i>                                                                      | " <i>age-1</i> " in Figure 4–figure supplement 1C             |
| IV401   | <i>unc-17(e245) IV; oyEx [str-1::GCaMP3, unc-122::dsRed]</i>                                                                           | " <i>unc-17</i> " in Figure 4E, Figure 4–figure supplement 1F |
| IV487   | <i>unc-17(e245) IV; oyEx [str-1::GCaMP3, unc-122::dsRed]; ueEx305 [gpa-4deletion::unc-17::sl2mCherry, unc-122::gfp]</i>                | " <i>unc-17; AWA::unc-17</i> " in Figure 4E                   |
| IV539   | <i>unc-17(e245) IV; oyEx [gpa-4::GCaMP2.2b, unc-122::dsRed]</i>                                                                        | " <i>unc-17</i> " in Figure 4–figure supplement 1D            |
| IV416   | <i>oyEx [str-1::GCaMP3, unc-122::dsRed]; ueEx257 [gpa-4deletion::TeTX::sl2mCherry, unc-122::gfp]</i>                                   | " <i>AWA::TeTX</i> " in Figure 3D                             |
| IV392   | <i>oyEx [str-1::GCaMP3, unc-122::dsRed]; ueEx131 [odr-3::TeTX::sl2mCherry, elt-2::gfp]</i>                                             | " <i>AWC::TeTX</i> " in Figure 3D                             |
| IV216   | <i>ueEx131 [odr-3::TeTX::sl2mCherry, elt-2::gfp]</i>                                                                                   | " <i>AWC::TeTX</i> " in Figure 8–figure supplement 2B         |
| IV640   | <i>oyEx [str-1::GCaMP3, unc-122::dsRed]; ueEx434 [gpa-4deletion::cho-1</i>                                                             | " <i>AWA::cho-1 RNAi</i> " in Figure 4F                       |

|                                        |                                                                                                                                                         |                                                                    |
|----------------------------------------|---------------------------------------------------------------------------------------------------------------------------------------------------------|--------------------------------------------------------------------|
|                                        | <i>sense:sl2mCherry, gpa-4deletion::cho-1 antisense:sl2mCherry, unc-122::gfp]</i>                                                                       |                                                                    |
| IV644                                  | <i>oyEx [str-1::GCaMP3, unc-122::dsRed]; ueEx438[gpa-4deletion::cha-1 sense:sl2mCherry, gpa-4deletion::cha-1 antisense:sl2mCherry, unc-122::gfp]</i>    | "AWA::cha-1 RNAi" in Figure 4F,H                                   |
| IV654                                  | <i>oyEx [gpa-4::GCaMP2.2b, unc-122::dsRed]; ueEx438[gpa-4deletion::cha-1 sense:sl2mCherry, gpa-4deletion::cha-1 antisense:sl2mCherry, unc-122::gfp]</i> | "AWA::cha-1 RNAi" in Figure 4-figure supplement 1E                 |
| IV469                                  | <i>glp-1(e2141ts) III; ueEx7 [gcy-7::GCaMP3, unc-122::gfp]</i>                                                                                          | "glp-1" in Figure 5-figure supplement 5A,E                         |
| IV461                                  | <i>glp-1(e2141ts) III; oyEx [str-1::GCaMP3, unc-122::dsRed]</i>                                                                                         | "glp-1" in Figure 5-figure supplement 5B,F                         |
| IV532                                  | <i>ueEx7 [gcy-7::GCaMP3, unc-122::gfp]; uthIs202 [aak-2::aak-2(aa1-aa321 gf):Tomato, rol-6]</i>                                                         | "aak-2(gf)" in Figure 5-figure supplement 5C,G                     |
| IV537                                  | <i>oyEx [str-1::GCaMP3, unc-122::dsRed]; uthIs202 [aak-2::aak-2(aa1-aa321 gf):Tomato, rol-6]</i>                                                        | "aak-2(gf)" in Figure 5-figure supplement 5D,H                     |
| IV404                                  | <i>ueEx7 [gcy-7::GCaMP3, unc-122::gfp]; ueEx247 [ceh-36deletion::tom-1 sense:sl2mCherry, ceh-36deletion::tom-1 antisense:sl2mCherry, unc-122::rfp]</i>  | "AWC::tom-1 RNAi" in Figures 6,8E and Figure 6-figure supplement 1 |
| IV467                                  | <i>ueEx7 [gcy-7::GCaMP3, unc-122::gfp]; ueEx292 [odr-3::ins-1(OE):sl2mCherry, unc-122::rfp]</i>                                                         | "AWC::ins-1(OE)" in Figures 6,8E and Figure 6-figure supplement 1  |
| IV511                                  | <i>ueEx7 [gcy-7::GCaMP3, unc-122::gfp]; ueEx321 [gcy-7::daf-2(OE):sl2mCherry, unc-122::rfp]</i>                                                         | "ASEL::daf-2(OE)" in Figure 6 and Figure 6-figure supplement 1     |
| IV497                                  | <i>oyEx [str-1::GCaMP3, unc-122::dsRed]; ueEx310 [gpa-4deletion::unc-17(OE):sl2mCherry, unc-122::gfp]</i>                                               | "AWA::unc-17(OE)" in Figures 7,8D and Figure 7-figure supplement 1 |
| IV596                                  | <i>che-1(p672) I; ueEx247 [ceh-36deletion::tom-1 sense:sl2mCherry, ceh-36deletion::tom-1 antisense:sl2mCherry, unc-122::rfp]</i>                        | "ASE(-); AWC::tom-1 RNAi" in Figure 6G                             |
| IV598                                  | <i>peIs1715 [str-1::mCasp-1, unc-122::mCherry]; ueEx310 [gpa-4deletion::unc-17(OE):sl2mCherry, unc-122::gfp]</i>                                        | "AWB(-); AWA::unc-17(OE)" in Figure 7F                             |
| <b>Additional strains for behavior</b> |                                                                                                                                                         |                                                                    |
| N2                                     | Bristol strain                                                                                                                                          | "WT" in all behavior and lifespan figures                          |
| PY7502                                 | <i>oyIs [ceh-36del::caspase-3(p12)::nz, ceh-36del::cz::caspase-3(p17), srtx-1::gfp,</i>                                                                 | "AWC(-)" in Figures 1E,5J                                          |

|        |                                                               |                                                                             |
|--------|---------------------------------------------------------------|-----------------------------------------------------------------------------|
|        | <i>unc-122::dsRed</i>                                         |                                                                             |
| IV658  | <i>ueEx257 [gpa-4deletion::TeTX:sl2mCherry, unc-122::gfp]</i> | " <i>AWA::TeTX</i> " in Figures 1E and 5J and Figure 8–figure supplement 2B |
| PR672  | <i>che-1(p672) I</i>                                          | "ASE(-)" in Figures 1E,5J,6G                                                |
| JN1715 | <i>peIs1715 [str-1::mCasp-1, unc-122::mCherry]</i>            | "AWB(-)" in Figure 1E,5J,7F                                                 |
| JN1713 | <i>peIs1713 [sra-6::mCasp-1, unc-122::mCherry]</i>            | "ASH(-)" in Figures 1E,5J                                                   |
| CF1903 | <i>glp-1(e2141ts) III</i>                                     | " <i>glp-1</i> " in Figure 5–figure supplement 5I                           |
