# Supplementary material for: Circuit mechanisms encoding odors and driving aging-associated behavioral declines in Caenorhabditis elegans
Source: eLife. 2015 Sep 22;4:e10181. doi: 10.7554/eLife.10181 (PMC4577979; doi:10.7554/eLife.10181)
Supplement: Figure 1—source data 1. — DOI: http://dx.doi.org/10.7554/eLife.10181.004 [file elife10181s001.xlsx]

## Sheet: Sheet1
Figure 1–Source data 1
Figure 1E
Genotype	Wild-type	AWC(-)	AWA::TeTX	ASE(-)	AWB(-)	ASH(-)
Age (Days of Adulthood)	1
Average	0.473127	0.0240499	0.106786	0.127142	0.309148	0.35848
s.e.m.	0.0366203	0.0768683	0.0596684	0.0805737	0.058317	0.0663215
n	24	10	9	9	9	9
Chemotaxis Index	0.652174	-0.384615	0.129032	-0.146341	-0.0759494	0.506024
	0.776471	0.340909	0.147541	0.232558	0.288889	0.247312
	0.518519	0.111111	0.5	0.448276	0.521739	0.59322
	0.32	-0.20339	0.129032	-0.285714	0.522388	-0.0222222
	0.431818	0.435897	0.162791	0.0882353	0.279412	0.277778
	0.555556	-0.146341	-0.0277778	0.0707965	0.328947	0.208333
	0.161765	-0.0175439	-0.121212	0.30137	0.26	0.422222
	0.33871	0.0588235	0.0952381	0.0493827	0.305556	0.422222
	0.45098	0.0645161	-0.0535714	0.385714	0.351351	0.571429
	0.71875	-0.0188679
	0.530864
	0.530612
	0.490909
	0.717949
	0.537634
	0.378378
	0.565217
	0.606061
	0.350515
	0.337079
	0.647059
	0.473282
	0.177778
	0.0869565
Statistics	2-tailed t-test, with Bonferroni correction
	Groups Compared		P-value
	AWC(-) compared to WT		0.000140073	*
	AWA::TeTX compared to WT		0.000114365	*
	ASE(-) compared to WT		0.00225306	*
	AWB(-) compared to WT		0.0116941	*
	ASH(-) compared to WT		0.153785	NS
