# Supplementary material for: Circuit mechanisms encoding odors and driving aging-associated behavioral declines in Caenorhabditis elegans
Source: eLife. 2015 Sep 22;4:e10181. doi: 10.7554/eLife.10181 (PMC4577979; doi:10.7554/eLife.10181)
Supplement: Figure 1—source data 2. — DOI: http://dx.doi.org/10.7554/eLife.10181.005 [file elife10181s002.xlsx]

## Sheet: Sheet1
Figure 1–figure supplement 1-Source data
	Figure 1-figure supplement 1A						Figure 1-figure supplement 1B
Neuron	AWCON	AWA	ASEL	AWB		Neuron	AWCON	AWA	ASEL	AWB
Genotype	Wild-type					Genotype	Wild-type
Time period	Odor removal	Odor addition	Odor removal	Odor removal		Time period	Odor removal	Odor addition	Odor removal	Odor removal
Average	164.226	51.8916	131.071	414.316		Average	1.15	1.7	5.45714	0.692857
s.e.m.	26.0001	8.616	38.5938	48.7319		s.e.m.	0.437117	0.179682	0.823802	0.22954
n	14	15	14	14		n	14	15	14	14
Maximum DF/F (%)	135.44	64.4113	90.2339	539.476		Time to maximum DF/F (s)	0.4	1.1	2.1	0
	143.139	49.7843	52.725	401.57			1.6	0.9	9.4	0.5
	181.016	34.6266	288.96	504.905			0.4	1.1	3	1.6
	58.4013	70.3958	580.944	318.477			0	2.7	7.8	0.3
	151.247	1.8021	133.894	282.043			0.4	2.2	3	0
	343.982	5.8328	50.4518	405.912			0	3.3	5.4	2.1
	260.618	77.9146	114.841	525.312			3.4	1.8	2.1	0
	102.922	79.2629	53.941	165.116			0.4	1.4	9	0
	83.9607	88.9296	127.152	598.925			1.2	0.9	10.7	0
	63.4094	48.0637	103.035	196.785			5.3	2	3.2	1.7
	125.83	54.9509	49.0214	569.385			0	1.4	3.8	1.3
	63.941	117.446	97.2145	782.331			3	1.9	2.4	2.1
	335.263	57.4194	36.54	167.286			0	2.2	8.7	0
	250	20.8495	56.0448	342.895			0	1.1	5.8	0.1
		6.6845						1.5
