# Supplementary material for: Circuit mechanisms encoding odors and driving aging-associated behavioral declines in Caenorhabditis elegans
Source: eLife. 2015 Sep 22;4:e10181. doi: 10.7554/eLife.10181 (PMC4577979; doi:10.7554/eLife.10181)
Supplement: Figure 2—source data 1. — DOI: http://dx.doi.org/10.7554/eLife.10181.008 [file elife10181s003.xlsx]

## Sheet: Sheet1
Figure 2–Source data 1
	Figure 2A					Figure 2B					Figure 2C					Figure 2D
Neuron	AWCON					AWA					ASEL					AWB
Ablation condition	Mock	AWA(-)	ASE(-)	AWB(-)		Mock	AWC(-)	ASE(-)	AWB(-)		Mock	AWC(-)	AWA(-)	AWB(-)		Mock	AWC(-)	AWA(-)	ASE(-)
Average	84.6037	106.626	112.614	152.923		38.6073	47.2774	33.8058	25.2018		58.4823	1.18416	66.5794	46.4475		148.658	167.118	64.9516	191.677
s.e.m.	10.284	21.8116	27.8303	32.0722		12.4688	13.3925	10.0182	8.86109		17.8317	4.44907	23.9912	22.4135		20.2594	42.4682	12.7019	46.4547
n	12	11	11	11		13	12	12	12		12	11	11	9		20	12	12	12
Averaged DF/F for time period in yellow box	31.8076	26.8165	-12.8098	42.1784		-7.297	4.3963	-7.0274	-1.8826		4.2479	-24.6612	-13.8592	-4.1389		37.5834	15.22	8.1301	31.0715
	48.9247	47.145	41.0964	50.3305		-6.5333	6.8936	6.7091	4.1217		9.2442	-15.2557	2.5332	12.3484		39.3401	24.9146	26.2927	45.763
	50.6266	64.0878	46.6461	60.5764		-1.4776	13.9893	10.3611	5.6942		15.9285	-7.0736	6.3316	21.2266		61.3094	59.0728	28.156	58.7972
	54.0701	64.6438	52.2304	79.7337		10.4608	19.3171	13.4887	8.4327		20.5237	-5.9635	7.1143	22.968		70.3347	98.5779	37.1152	122.027
	68.2922	72.0353	87.5897	89.1708		11.1467	24.1668	15.6191	14.2545		33.7648	-0.3682	26.2425	26.21		72.8489	120.1	38.1186	122.627
	88.3411	78.6595	106.171	136.731		15.932	32.5532	21.6672	14.6138		39.5764	0.3416	44.9617	28.8616		85.4213	120.296	43.9733	125.587
	90.9229	100.058	122.353	168.16		16.8849	33.1163	21.8976	15.0769		42.2416	3.7034	48.1427	40.4315		95.7007	132.1	58.2833	146.148
	93.7933	102.234	133.187	186.128		36.289	40.2597	29.891	20.9265		45.3132	4.9295	52.3915	49.032		102.218	153.161	83.4849	193.053
	95.3505	142.586	154.221	192.36		55.8516	47.1496	45.6113	27.2567		62.7414	11.9901	182.921	221.089		106.44	169.058	84.0043	201.351
	115.524	211.217	172.069	323.252		68.52	89.6807	56.5229	29.7453		98.0858	17.4751	184.892			120.832	246.593	86.9486	311.212
	123.566	263.404	336.002	353.537		72.0339	92.4327	73.2194	53.1559		103.235	27.9083	190.702			135.178	322.038	138.228	342.092
	154.024					83.6565	163.374	117.71	111.026		226.885					148.004	544.288	146.684	600.396
						146.427										149.335
																150.154
																175.588
																232.656
																255.047
																285.37
Statistics	2-tailed t-test, with Bonferroni correction					2-tailed t-test, with Bonferroni correction					2-tailed t-test, with Bonferroni correction					308.216
	Groups Compared		P-value			Groups Compared		P-value			Groups Compared		P-value			341.582
	Mock compared to AWA(-)		0.376257	NS		Mock compared to AWC(-)		0.640155	NS		Mock compared to AWC(-)		0.00861376	*
	Mock compared to ASE(-)		0.36274	NS		Mock compared to ASE(-)		0.76681	NS		Mock compared to AWA(-)		0.789426	NS
	Mock compared to AWB(-)		0.0652157	NS		Mock compared to AWB(-)		0.390625	NS		Mock compared to AWB(-)		0.679765	NS		2-tailed t-test, with Bonferroni correction
																Groups Compared		P-value
																Mock compared to AWC(-)		0.69996	NS
																Mock compared to AWA(-)		0.00151685	*
																Mock compared to ASE(-)		0.40909	NS
