# Supplementary material for: Circuit mechanisms encoding odors and driving aging-associated behavioral declines in Caenorhabditis elegans
Source: eLife. 2015 Sep 22;4:e10181. doi: 10.7554/eLife.10181 (PMC4577979; doi:10.7554/eLife.10181)
Supplement: Figure 3—source data 1. — DOI: http://dx.doi.org/10.7554/eLife.10181.010 [file elife10181s004.xlsx]

## Sheet: Sheet1
Figure 3–Source data 1
	Figure 3A				Figure 3B				Figure 3C				Figure 3D
Neuron	AWCON				AWA				ASEL				AWB
Genotype	WT	unc-13	unc-31		WT	unc-13	unc-31		WT	unc-31	unc-31; AWC::unc-31		WT	unc-13	AWA::TeTX	AWC::TeTX
Average	54.6376	28.0638	44.3447		31.0637	21.5299	44.3563		49.6699	3.98767	26.4508		166.737	19.8845	70.548	126.679
s.e.m.	7.31494	9.02922	24.109		6.72887	9.80389	12.836		5.7604	1.60974	7.68578		27.0123	6.49704	26.5471	26.8458
n	17	14	15		18	12	12		14	18	12		16	16	18	12
Averaged DF/F for time period in yellow box	9.5589	-1.1512	2.1802		0.6033	-6.0087	-9.905		18.6142	-10.6277	-15.1395		34.0808	-3.9128	-14.2035	1.1921
	19.5738	1.4287	2.6608		5.0611	-3.1267	-0.8544		25.6614	-7.9398	-0.1167		38.099	-2.9889	-13.4023	72.6613
	20.5083	4.4026	7.6919		7.3063	-1.388	3.455		30.0411	-0.9603	2.8895		57.485	-1.0129	-8.9491	73.4873
	27.9207	5.6507	9.7855		9.7119	-0.6133	9.41		33.9114	-0.4261	13.3268		70.0755	0.6843	-5.4456	79.8599
	29.2235	6.6554	10.2201		11.5574	5.3883	9.5968		36.572	0.6777	17.7139		82.7515	3.8844	-5.2556	82.1918
	38.19	7.224	13.9724		12.3352	8.6647	32.4893		38.6802	0.8939	21.374		92.8772	6.5879	-0.0404	82.3416
	41.229	7.8035	13.9866		15.3693	17.6683	55.719		40.0306	2.0948	24.3134		124.447	12.3259	2.3168	99.8525
	46.1521	16.0001	15.2783		18.8035	18.6814	56.362		44.8038	2.2965	35.1212		151.712	14.3499	2.4119	102.381
	48.0196	29.8801	16.5985		21.7279	20.9175	64.9825		62.3579	3.5608	40.8341		162.841	14.4065	7.2956	138.217
	50.0668	31.0639	21.2733		23.5933	37.4546	75.7732		65.2131	4.5082	42.5746		175.588	19.8017	7.6631	213.868
	57.0526	36.5566	24.0944		25.3447	43.7519	110.713		65.6462	5.1532	49.1605		209.145	21.409	19.6283	227.814
	74.1196	60.8202	38.8025		25.7352	116.969	124.534		69.7174	6.1227	85.3575		216.219	22.8451	55.09	346.287
	82.0525	69.8202	42.4424		35.1353				69.874	7.4992			254.748	32.2031	91.7669
	90.9393	116.738	70.601		36.715				94.255	8.9256			264.331	33.5843	141.32
	91.5507		375.582		54.2515					9.9016			324.321	41.1338	146.905
	100.469				68.161					10.9532			409.075	102.85	197.866
	102.213				88.987					11.7913					277.136
					98.7484					17.3533					367.76
Statistics	2-tailed t-test, with Bonferroni correction
	Groups Compared		P-value		2-tailed t-test, with Bonferroni correction				2-tailed t-test, with Bonferroni correction				2-tailed t-test, with Bonferroni correction
	WT compared to unc-13		0.0304559	NS	Groups Compared		P-value		Groups Compared		P-value		Groups Compared		P-value
	WT compared to unc-31		0.688107	NS	WT compared to unc-13		0.431742	NS	WT compared to unc-31		1.4914e-06	*	WT compared to unc-13		6.38002e-05	*
					WT compared to unc-31		0.371845	NS	unc-31 compared to unc-31; AWC::unc-31		0.0143676	*	WT compared to AWA::TeTX		0.0161843	*
									WT compared to unc-31; AWC::unc-31		0.0247281	NS	WT compared to AWC::TeTX		0.302766	NS
