# Supplementary material for: Circuit mechanisms encoding odors and driving aging-associated behavioral declines in Caenorhabditis elegans
Source: eLife. 2015 Sep 22;4:e10181. doi: 10.7554/eLife.10181 (PMC4577979; doi:10.7554/eLife.10181)
Supplement: Figure 3—source data 2. — DOI: http://dx.doi.org/10.7554/eLife.10181.011 [file elife10181s005.xlsx]

## Sheet: Sheet1
Figure 3–figure supplement 1 Source data 1
	Figure 3–figure supplement 1A				Figure 3–figure supplement 1B				Figure 3–figure supplement 1C			Figure 3–figure supplement 1D
Neuron	AWCOFF				ASER				ASEL			AWB
Genotype	WT	unc-13	unc-31		WT	unc-13	unc-31		WT	unc-13		WT	unc-31
Average	126.657	52.6705	81.9702		46.4273	35.8161	22.6949		48.098	17.0314		160.754	122.554
s.e.m.	19.2545	14.4119	18.3294		4.55233	11.3617	7.97609		17.1422	4.10423		18.8445	27.6021
n	15	13	13		12	8	8		15	15		13	13
Averaged DF/F for time period in yellow box	6.4472	1.4435	1.169		22.2704	2.621	-0.1921		11.3536	-0.7116		58.805	14.1169
	34.7204	15.6119	10.494		31.0392	4.6974	4.8481		11.8625	2.4299		86.0866	15.6255
	40.7221	16.8695	16.8514		38.6945	13.1611	11.8548		15.5643	3.927		95.7	25.8702
	62.7829	18.4697	22.4356		39.6178	29.8807	13.3645		16.5757	4.1565		97.3982	44.8004
	89.0868	23.3943	53.789		40.0433	30.3467	16.962		25.3846	6.294		110.869	93.0046
	103.419	23.783	56.9784		40.5	39.622	28.9626		25.6665	7.9893		131.151	104.077
	112.82	29.7194	71.2241		42.7521	76.2358	35.2541		28.5957	12.8545		174.363	114.438
	145.937	45.6677	84.174		43.9217	89.9638	70.5053		30.762	12.9509		182.233	116.991
	151.504	48.3227	89.8897		54.5314				35.8827	13.517		200.057	187.757
	156.976	54.7187	113.052		57.2899				37.6195	15.8823		214.274	203.215
	158.804	109.387	163.87		66.4335				39.2914	18.2658		227.772	236.246
	166.607	116.917	189.046		80.0342				49.9922	27.4066		243.283	258.186
	169.298	180.412	192.64						50.794	33.3345		267.807	301.039
	203.568								59.9175	43.0843
	297.166								282.208	54.0901
Statistics	2-tailed t-test, with Bonferroni correction				2-tailed t-test, with Bonferroni correction				2-tailed t-test			2-tailed t-test
	Groups Compared		P-value		Groups Compared		P-value		Groups Compared	P-value		Groups Compared	P-value
	WT compared to unc-13		0.00503116	*	WT compared to unc-13		0.407835	NS	WT compared to unc-13	0.0975667	NS	WT compared to unc-31	0.389933	NS
	WT compared to unc-31		0.104753	NS	WT compared to unc-31		0.0245843	*
