# Supplementary material for: Circuit mechanisms encoding odors and driving aging-associated behavioral declines in Caenorhabditis elegans
Source: eLife. 2015 Sep 22;4:e10181. doi: 10.7554/eLife.10181 (PMC4577979; doi:10.7554/eLife.10181)
Supplement: Figure 4—source data 1. — DOI: http://dx.doi.org/10.7554/eLife.10181.014 [file elife10181s006.xlsx]

## Sheet: Sheet1
Figure 4–Source data 1
	Figure 4A					Figure 4B			Figure 4C				Figure 4D				Figure 4E				Figure 4F				Figure 4G				Figure 4H
Neuron	ASEL					ASEL			ASEL				ASEL				AWB				AWB				Genotype	WT	AWC::ins-1 RNAi		Genotype	WT	AWA::cha-1 RNAi
Genotype	WT	ins-1	ins-1; AWC::ins-1	ins-1; AWA::ins-1		WT	AWC::ins-1 RNAi		WT	daf-2	daf-2; ASEL::daf-2		WT	age-1	age-1; ASEL::age-1		WT	unc-17	unc-17; AWA::unc-17		WT	AWA::cha-1 RNAi	AWA::cho-1 RNAi		Age (Days of Adulthood)	1			Age (Days of Adulthood)	1
Average	70.1662	23.3738	73.6592	23.5701		80.1642	25.0858		50.5126	7.12367	36.6221		52.7116	14.621	40.3152		131.255	20.5168	90.6558		218.177	40.306	259.873		Average	0.463708	0.204373		Average	0.500497	0.29875
s.e.m.	9.76513	4.18039	13.1936	8.17687		9.27461	6.83129		9.38539	2.91269	5.84816		14.1055	3.85214	5.71035		21.9887	6.7103	23.2793		33.1581	13.5568	42.1243		s.e.m.	0.0481314	0.0527527		s.e.m.	0.0441822	0.0236709
n	24	25	12	12		14	14		14	12	12		19	18	12		16	21	16		18	12	9		n	9	9		n	9	9
Averaged DF/F for time period in yellow box	-3.0956	-1.415	5.2958	-5.8176		38.492	-5.6053		10.3874	-2.5294	11.3209		15.5643	-8.8785	9.2299		10.3448	-31.7696	13.2317		55.3526	-15.3709	135.813		Chemotaxis Index	0.461538	-0.0634921		Chemotaxis Index	0.464286	0.289474
	15.7126	0.3823	9.4446	-4.3559		47.8266	-0.2183		10.8501	0.7415	13.7142		16.5757	-1.8426	20.6541		12.2598	-14.3153	16.9088		77.5018	-5.8175	160.54			0.386364	0.175676			0.371429	0.227273
	15.7476	1.0354	51.4231	1.3766		52.0795	0.1516		13.5944	0.9314	22.2521		19.6673	-0.6774	24.5396		38.4117	-10.6621	23.0208		99.1712	0.3955	168.753			0.512195	0.192982			0.547619	0.358974
	23.2143	1.4901	54.7014	1.7269		52.7292	5.6214		16.8913	1.2593	23.074		20.6462	0.3377	31.4155		52.7573	-8.128	33.5553		111.525	12.2925	207.455			0.225806	0.0169492			0.368421	0.32
	41.2397	2.7199	68.4476	15.4983		55.0359	8.6156		23.52	1.6397	25.8251		24.1762	0.7686	33.4379		57.3182	-4.2511	49.489		123.743	19.6544	227.6			0.407407	0.160714			0.298246	0.272727
	44.6491	3.7127	70.181	20.3204		55.5338	12.826		33.2974	3.4428	26.3772		25.1132	1.942	34.5039		78.3833	-3.2158	52.2122		134.131	24.7969	284.189			0.36	0.288889			0.571429	0.181818
	45.743	3.9975	71.8196	25.7206		65.6703	13.4618		44.9513	3.891	29.1282		25.524	4.0428	38.436		114.672	-2.5952	52.9783		138.203	40.0526	300.083			0.552632	0.309524			0.588235	0.273438
	56.8079	6.9981	73.2108	25.8124		76.0311	19.4941		57.1518	5.3753	44.3366		27.8069	6.207	39.543		129.327	-1.9726	56.0189		141.017	46.1212	300.332			0.528302	0.454545			0.592105	0.414474
	56.9512	7.7876	92.9403	25.9151		78.3458	28.107		62.3537	5.4431	53.8485		30.4023	11.2751	51.7691		140.989	2.282	60.2384		177.568	49.2853	554.094			0.73913	0.303571			0.702703	0.350575
	58.4009	8.1381	101.387	33.7822		87.2866	35.2065		64.4595	14.7089	57.2532		36.881	14.6882	52.7857		141.569	9.0297	79.824		191.633	65.5886
	58.6077	13.1757	106.083	44.6356		109.855	40.2404		73.1904	17.0542	57.3894		39.8996	16.4354	70.7481		163.385	13.6628	87.369		228.195	96.4488
	59.0797	14.9271	178.977	98.2266		129.318	50.0383		78.0378	33.5263	74.9455		44.6323	16.7978	76.7195		179.542	18.3433	88.9254		238.995	150.225
	60.2338	16.0389				132.397	68.0397		89.8889				45.1751	22.5621			201.996	27.3724	102.118		245.239
	66.8408	22.7541				141.698	75.2222		128.602				47.6417	26.4223			210.732	37.0675	147.673		273.917
	66.8779	25.0997											50.6732	33.0319			250.518	37.5089	197.81		296.629
	69.8761	30.733											50.794	33.5284			317.882	50.0938	389.12		310.298
	72.8604	34.5613											65.3755	33.659				54.7119			491.351
	75.7497	37.5622											132.763	52.8779				60.1836			592.708
	78.4947	40.7016											282.208					61.6749
	103.235	44.0584																64.4072
	107.191	44.0584																71.4252
	134.793	48.0453
	156.125	48.0453
	218.654	63.7391
		65.9973
Statistics	2-tailed t-test, with Bonferroni correction					2-tailed t-test			2-tailed t-test, with Bonferroni correction				2-tailed t-test, with Bonferroni correction				2-tailed t-test, with Bonferroni correction				2-tailed t-test, with Bonferroni correction				Statistics	2-tailed t-test			Statistics	2-tailed t-test
	Groups compared		P-value			Groups compared	P-value		Groups compared		P-value		Groups compared		P-value		Groups compared		P-value		Groups compared		P-value		Groups compared	P-value			Groups compared	P-value
	WT and ins-1		0.000115852	*		WT and ins-1	7.31153e-05	*	WT and daf-2		0.000468433	*	WT and age-1		0.0166666	*	WT and unc-17		0.000142216	*	WT and AWA::cha-1 RNAi		5.59125e-05	*	WT and AWC::ins-1 RNAi	0.0022708	*		WT and AWA::cha-1 RNAi	0.00161981	*
	ins-1 and ins-1; AWC::ins-1		0.00294335	*					daf-2 and daf-2; ASEL::daf-2		0.000345201	*	age-1 and age-1; ASEL::age-1		0.00127395	*	unc-17 and unc-17; AWA::unc-17		0.00984822	*	WT and AWA::cho-1 RNAi		0.446921	NS
	WT and ins-1; AWC::ins-1		0.833351	NS					WT and daf-2; ASEL::daf-2		0.2227	NS	WT and age-1; ASEL::age-1		0.423525	NS	WT and unc-17; AWA::unc-17		0.214633	NS
	WT and ins-1; AWA::ins-1		0.000881679	*
