# Supplementary material for: Circuit mechanisms encoding odors and driving aging-associated behavioral declines in Caenorhabditis elegans
Source: eLife. 2015 Sep 22;4:e10181. doi: 10.7554/eLife.10181 (PMC4577979; doi:10.7554/eLife.10181)
Supplement: Figure 4—source data 2. — DOI: http://dx.doi.org/10.7554/eLife.10181.015 [file elife10181s007.xlsx]

## Sheet: Sheet1
Figure 4–figure supplement 1 Source data 1
	Figure 4–figure supplement 1A			Figure 4–figure supplement 1B			Figure 4–figure supplement 1C			Figure 4–figure supplement 1D			Figure 4–figure supplement 1E			Figure 4–figure supplement 1F
Neuron	AWCON			AWCON			AWCON			AWB			AWA			AWA
Genotype	WT	ins-1		WT	daf-2		WT	age-1		WT	unc-17		WT	unc-17		WT	AWA::cha-1 RNAi
Average	29.4103	29.1177		58.2215	55.4146		59.8854	74.4093		370.48	241.44		26.6955	45.2963		33.8075	29.8005
s.e.m.	10.7658	8.01368		13.7221	30.1964		8.64195	9.8784		58.9632	56.3807		8.31652	15.1029		10.7223	7.67876
n	8	9		9	8		11	11		11	12		13	14		13	13
Averaged DF/F for time period in yellow box	7.8231	5.6271		13.0954	18.5364		102.213	60.8928		19.6385	10.633		0.1426	8.6098		-3.5194	-4.9818
	9.3562	8.1869		22.8311	18.8467		27.9207	108.585		98.4672	23.2755		89.4229	157.72		-2.6894	8.0913
	12.9275	16.1307		23.4544	11.8688		38.19	23.4394		173.748	63.9461		73.2049	18.0696		10.633	10.739
	16.3711	19.7046		25.3588	36.663		83.7062	101.47		280.777	91.2302		12.3649	58.9843		12.1679	11.8181
	20.6693	22.9646		58.8152	22.7583		29.2235	44.642		394.428	148.626		5.1152	-16.4333		12.3432	12.161
	21.6395	25.1996		62.9285	20.4579		46.1521	117.284		449.716	153.318		55.6679	36.8602		14.6962	16.4896
	48.749	25.9629		80.824	49.5016		48.0196	88.3259		500.548	167.628		3.0481	25.3342		16.7311	18.2432
	97.7467	61.7375		107.921	264.684		41.229	25.8328		529.083	337.476		12.2698	-7.3077		22.5985	20.7374
		76.5453		128.765			100.469	69.1187		530.651	406.496		5.8632	172.121		24.321	32.7646
							50.0668	101.597		539.058	422.773		9.9974	26.6285		49.233	39.5765
							91.5507	77.3158		559.17	532.106		26.055	15.132		67.8107	67.5213
											539.772		4.6327	72.0936		90.4027	69.364
													49.2565	57.6409		124.769	84.8818
														8.6951
Statistics	2-tailed t-test			2-tailed t-test			2-tailed t-test			2-tailed t-test			2-tailed t-test			2-tailed t-test
	Groups compared	P-value		Groups compared	P-value		Groups compared	P-value		Groups compared	P-value		Groups compared	P-value		Groups compared	P-value
	WT and ins-1	0.982928	NS	WT and daf-2	0.934258	NS	WT and age-1	0.281838	NS	WT and unc-17	0.128779	NS	WT and unc-17	0.293445	NS	WT and AWA::cha-1 RNAi	0.764145	NS
