# Supplementary material for: Circuit mechanisms encoding odors and driving aging-associated behavioral declines in Caenorhabditis elegans
Source: eLife. 2015 Sep 22;4:e10181. doi: 10.7554/eLife.10181 (PMC4577979; doi:10.7554/eLife.10181)
Supplement: Figure 5—source data 1. — DOI: http://dx.doi.org/10.7554/eLife.10181.018 [file elife10181s008.xlsx]

## Sheet: Sheet1
Figure 5–Source data 1
Figure 5A								Figure 5B				Figure 5G										Figure 5H											Figure 5I											Figure 5J
Genotype	Wild-type							Genotype	Wild-type			Neuron	AWCON		AWA		ASEL		AWB			Neuron	AWCON		AWA		ASEL		AWB				Neuron	AWCON		AWA		ASEL		AWB				Genotype	Wild-type	AWC(-)	AWA::TeTX	ASE(-)	AWB(-)
Age (Days of Adulthood)	1	2	3	4	5	6		Age (Days of Adulthood)	1	5		Genotype	Wild-type		Wild-type		Wild-type		Wild-type			Genotype	Wild-type		Wild-type		Wild-type		Wild-type				Genotype	Wild-type		Wild-type		Wild-type		Wild-type				Age (Days of Adulthood)	5
Average	0.488468	0.338402	0.366617	0.282016	0.187562	0.120834		Average	0.0817182	0.0712273		Age (Days of Adulthood)	1	5	1	5	1	5	1	5		Age (Days of Adulthood)	1	5	1	5	1	5	1	5			Age (Days of Adulthood)	1	5	1	5	1	5	1	5			Average	0.181747	-0.102532	0.0713395	0.213201	0.186753
s.e.m.	0.0286481	0.085451	0.0628224	0.0569423	0.0336767	0.0899739		s.e.m.	0.00746251	0.00451581		n	30	26	30	30	30	30	30	31		n	30	26	30	30	30	30	30	31			n	30	26	30	30	30	30	30	31			s.e.m.	0.02652	0.0212464	0.0262618	0.0305336	0.0550351
n	22	10	10	10	14	10		n	11	11												P-value (t-test including odor responsive traces only)	0.0642623		0.0820029		0.0279843		0.0909403				# odor responsive (greater than 10% DF/F)	27	23	21	26	29	15	30	21			n	18	9	10	10	10
																							NS		NS		*		NS				% odor responsive (greater than 10% DF/F)	90	88.4615	70	86.6667	96.6667	50	100	67.7419
Chemotaxis Index	0.177778	0.585366	0.692308	0.257143	0.295455	0.857143		Speed (mm/s)	0.0805	0.0829																							P-value (2-tailed Chi square test)	0.8527		0.1172		4.3676e-05		0.00066846				Chemotaxis Index	0.295455	-0.0833333	-0.0483871	0.363636	0.193548
	0.505747	0.108108	0.276596	0.0882353	0.0769231	0.148148			0.1106	0.0678		Maximum DF/F (%)	13.8089	2.2255	1.8021	13.3549	0.0514	-30.3184	37.6833	1.7757		Averaged DF/F after stimulus change	7.8231	-3.3	-1.4004	6.9706	-3.5086	-45.559	13.7	-24.1348															0.0769231	-0.0322581	0.0789474	0.25641	-0.0625
	0.625	0	0.390244	0.633333	0.193548	0.0888889			0.1123	0.0548			24.6684	58.4013	5.8328	18.8396	32.2328	-1.1019	153.054	3.7646			9.3562	2.5	0.6868	8.2765	11.3374	-43.2948	32.5	-10.2374			Averaged DF/F after stimulus change (time window described in Methods and materials)	7.8231	-3.3	-1.4004	6.9706	-3.5086	-45.559	13.7	-24.1348				0.193548	-0.0526316	0.153846	0.3	0.5
	0.652174	0.0769231	0.0740741	0.490196	0.295082	0.1			0.1126	0.07			26.3795	63.4094	6.6845	24.7196	35.5717	1.1884	165.116	10.3665			9.8414	7.5	2.7424	9.7434	11.6535	-29.3004	34.1	-4.6153				9.3562	2.5	0.6868	8.2765	11.3374	-43.2948	32.5	-10.2374				0.295082	-0.153846	0	0.225806	0.0882353
	0.564706	0.230769	0.444444	0.280702	0.195652	-0.156863			0.0639	0.0363			31.2373	63.941	7.6406	26.0071	45.1966	1.4431	167.286	12.0957			12.9275	29.4	3.0481	9.7832	13.8247	-20.1526	38.2	-3.8443				9.8414	7.5	2.7424	9.7434	11.6535	-29.3004	34.1	-4.6153				0.195652	-0.05	0.133333	0.295082	0.289474
	0.666667	0.584906	0.433333	0.388889	0.290323	-0.166667			0.0667	0.0754			31.8359	64.6894	10.8294	27.8143	47.4532	1.7504	196.785	13.3034			13.0954	34.4	5.1152	12.4481	17.0875	-14.8952	53.3	-2.0022				12.9275	29.4	3.0481	9.7832	13.8247	-20.1526	38.2	-3.8443				0.290323	-0.047619	0.189189	0.202703	0.3
	0.59596	0.387755	0.175	0.145833	0.285714	0.115385			0.1001	0.0907			37.2625	83.9607	10.9769	30.7954	64.4641	2.004	220.423	16.1781			16.3711	38.4	5.8632	12.8766	17.1659	-14.7513	57.5	-1.0876				13.0954	34.4	5.1152	12.4481	17.0875	-14.8952	53.3	-2.0022				0.285714	-0.12	-0.05	0.0540541	-0.0882353
	0.558559	0.60274	0.603448	0.272727	0.169492	-0.03125			0.0852	0.0731			38.947	86.7334	20.8495	31.127	65.0418	2.4852	243.476	16.9631			17.7649	38.8	7.7063	13.9732	20.2539	-13.7234	65.3	-0.6308				16.3711	38.4	5.8632	12.8766	17.1659	-14.7513	57.5	-1.0876				0.169492	-0.183099	0.0909091	0.186441	0.233333
	0.548387	0.72549	0.428571	0.207547	0.205128	0.151515			0.0549	0.0759			39.3568	104.523	22.2423	37.4654	78.6707	4.7371	258.185	18.3418			20.6693	39.4	7.7099	15.8342	25.0187	-12.3886	69.9	0.5235				17.7649	38.8	7.7063	13.9732	20.2539	-13.7234	65.3	-0.6308				0.205128	-0.2	0.119403	0.162162	0.189189
	0.626667	0.0819672	0.148148	0.0555556	0.15	0.102041			0.0407	0.0719			46.1744	115.898	22.818	46.3057	84.3219	5.4981	282.043	20.821			21.6395	41.5	9.9974	16.9534	32.8242	-8.0705	77.3	5.3244				20.6693	39.4	7.7099	15.8342	25.0187	-12.3886	69.9	0.5235				0.15		0.0461538	0.0857143	0.22449
	0.54717				-0.104167				0.0714	0.0847			49.9193	125.83	22.9861	59.4219	88.4689	8.0773	315.204	34.2548			22.8311	44.8	11.901	23.1218	33.1283	-6.3041	83	6.1104				21.6395	41.5	9.9974	16.9534	32.8242	-8.0705	77.3	5.3244				-0.104167
	0.613208				0.388889								53.4399	132.153	29.0503	59.6456	88.7334	10.7351	318.477	39.3366			23.3946	46.4	12.2698	23.2489	36.6677	-6.25	92.6	13.4018				22.8311	44.8	11.901	23.1218	33.1283	-6.3041	83	6.1104				0.388889
	0.595238				0.0434783								53.6709	135.44	34.6266	60.3947	89.3711	12.9312	342.895	49.0367			23.4544	46.9	12.3649	27.8012	36.9164	-5.7186	96.5	15.2885				23.3946	46.4	12.2698	23.2489	36.6677	-6.25	92.6	13.4018				0.0434783
	0.297297				0.140351			Statistics	2-tailed t-test				55.2428	140.421	43.8583	61.6903	89.7985	13.4854	349.269	55.7753			25.3588	47.4	15.9934	30.9222	38.7845	-4.2479	103.1	16.2766				23.4544	46.9	12.3649	27.8012	36.9164	-5.7186	96.5	15.2885				0.140351
	0.48								Groups Compared	P-value			59.0529	145.826	46.6205	64.8586	91.5066	19.8555	370.694	168.496			28.2497	49.4	19.1735	34.2225	40.2868	3.3167	113.6	54.5128				25.3588	47.4	15.9934	30.9222	38.7845	-4.2479	103.1	16.2766				0.220339
	0.421875								Day 1 vs. Day 5	0.246094			66.6127	150.461	48.0637	69.9902	93.0186	20.6109	396.449	213.932			33.1595	49.6	22.3528	35.7337	41.1174	4.1349	129.3	60.5696				28.2497	49.4	19.1735	34.2225	40.2868	3.3167	113.6	54.5128				0.176471
	0.452381												75.0528	174.246	49.7843	75.7739	93.4188	58.702	397.712	227.687			33.2728	67.9	26.055	35.7895	43.4178	13.0043	145.1	71.7183				33.1595	49.6	22.3528	35.7337	41.1174	4.1349	129.3	60.5696				0.135135
	0.333333												90.9862	193.264	54.9509	81.7934	96.6043	76.1687	401.57	245.33			48.749	85.3	26.3639	36.5284	43.4892	34.8381	152.9	81.5279				33.2728	67.9	26.055	35.7895	43.4178	13.0043	145.1	71.7183				0.113636
	0.296296												96.7796	335.263	57.4194	86.3321	104.42	133.08	404.525	263.055			52.7426	91.9	29.6719	40.7379	43.5642	37.9455	162.7	87.338				48.749	85.3	26.3639	36.5284	43.4892	34.8381	152.9	81.5279
	0.375												103.594	373.255	64.4113	87.1157	113.528	135.949	405.912	282.779			53.7047	127.2	33.3618	51.4007	44.9385	38.1803	173.4	87.7884				52.7426	91.9	29.6719	40.7379	43.5642	37.9455	162.7	87.338			Statistics	2-tailed t-test, with Bonferroni correction
	0.412844												114.286	435.649	70.3958	113.643	115.908	149.257	416.104	300.211			58.8152	167.5	36.0453	51.7803	45.1083	41.5377	178	90.9897				53.7047	127.2	33.3618	51.4007	44.9385	38.1803	173.4	87.7884				Groups Compared		P-value
	0.4												114.689	436.457	77.9146	137.144	118.71	152.109	447.431	302.794			62.9285	185.5	37.5294	55.8818	56.4959	48.8133	202.8	97.2588				58.8152	167.5	36.0453	51.7803	45.1083	41.5377	178	90.9897				AWC(-) compared to WT		1.23182e-08	*
													139.744	453.248	79.2629	142.583	123.896	162.369	504.905	373.726			64.994	187	37.7825	56.0118	57.0421	54.1955	212.9	103.16				62.9285	185.5	37.5294	55.8818	56.4959	48.8133	202.8	97.2588				AWA::TeTX compared to WT		0.00691326	*
Statistics	2-tailed t-test, with Bonferroni correction												140.009	456.873	88.9296	155.603	125.382	166.264	525.312	406.569			80.2574	209.7	38.2433	91.6371	57.1645	72.7231	216.6	105.852				64.994	187	37.7825	56.0118	57.0421	54.1955	212.9	103.16				ASE(-) compared to WT		0.445283	NS
	Groups Compared		P-value										143.139	493.471	100.332	183.745	140.078	172.144	539.476	411.124			80.824	228.4	49.2565	115	62.5662	80.2656	258.1	112.592				80.2574	209.7	38.2433	91.6371	57.1645	72.7231	216.6	105.852				AWB(-) compared to WT		0.935911	NS
	Day 2 compared to Day 1		0.123899	NS									172.65	880.47	102.158	206.396	147.911	178.297	548.402	411.414			83.3386	237.2	55.6679	123.584	64.6593	137.306	270.9	125.953				80.824	228.4	49.2565	115	62.5662	80.2656	258.1	112.592				ASH(-) compared to WT		0.645039	NS
	Day 3 compared to Day 1		0.10126	NS									186.779		117.446	237.234	151.514	257.773	569.385	492.623			93.7443	238.4	69.8993	134.273	64.8255	143.014	317.4	188.53				83.3386	237.2	55.6679	123.584	64.6593	137.306	270.9	125.953
	Day 4 compared to Day 1		0.00606245	*									211.738		124.571	238.191	166.565	329.636	758.326	574.775			97.7467		73.2049	136.106	70.2873	150.985	331.5	191.102				93.7443	238.4	69.8993	134.273	64.8255	143.014	317.4	188.53
	Day 5 compared to Day 1		1.74129e-07	*									365.836		154.504	270.748	190.554	351.376	782.331	651.125			146.201		89.4229	138.41	71.4579	202.425	355.2	209.755				97.7467		73.2049	136.106	70.2873	150.985	331.5	191.102
	Day 6 compared to Day 1		0.00256087	*									407.811		172.771	285.186	229.364	509.449	898.925	653.193			205.74		91.3259	145.507	88.223	301.726	415.6	233.441				146.201		89.4229	138.41	71.4579	202.425	355.2	209.755
													755.075		205.323	299.481	263.879			684.574			231.662		101.415	190.968	125.089	425.336	451.3	241.412				205.74		91.3259	145.507	88.223	301.726	415.6	233.441
																				899.707										260.044				231.662		101.415	190.968	125.089	425.336	451.3	241.412
																																									260.044
[truncated: 7 more columns]
