# Supplementary material for: Circuit mechanisms encoding odors and driving aging-associated behavioral declines in Caenorhabditis elegans
Source: eLife. 2015 Sep 22;4:e10181. doi: 10.7554/eLife.10181 (PMC4577979; doi:10.7554/eLife.10181)
Supplement: Figure 5—source data 2. — DOI: http://dx.doi.org/10.7554/eLife.10181.019 [file elife10181s009.xlsx]

## Sheet: Sheet1
Figure 5–figure supplement 1 Source data
Figure 5–figure supplement 1A				Figure 5–figure supplement 1B
Genotype	Wild-type			Neuron	AWCON		AWA		ASEL		AWB
Age (Days of Adulthood)	5	6		Genotype	Wild-type		Wild-type		Wild-type		Wild-type
Average	2656.32	2950.48		Age (Days of Adulthood)	1	5	1	5	1	5	1	5
s.d.	112.072	291.21		Average	0.811111	1.3913	1.83333	1.55	7.43793	7.41333	0.576667	1.39048
n	55	55		SEM	0.162717	0.367768	0.151553	0.0736415	0.605159	0.652531	0.183809	0.441475
				n (odor responsive traces only)	27	23	21	26	29	15	30	21
Worm perimeter (mm)	2382.06	2363.77		t-test (odor responsive traces only)	0.159306		0.103307		0.978105		0.100297
	2450.52	2457.13			NS		NS		NS		NS
	2454.69	2510.68
	2459.31	2538.18		Time to maximum DF/F (s) (for odor responsive traces only)	0	0	1.1	2.3	5.2	12.9	0.3	7.7
	2480.2	2568.25			0.1	0	1.7	1.7	14.1	4.7	0	0
	2483.29	2592.28			1.6	0	0.9	1.5	9.5	4.4	0	0
	2493.65	2612.32			1.4	0	1.6	2	3.3	6.2	0.5	0
	2533.26	2620.88			1.3	1.2	1.1	1.6	11.2	8.4	1.6	0
	2536.57	2643.1			2	4.2	2.7	1.5	8.1	9.1	0	6
	2536.85	2654.36			0.4	5.3	2.2	1.5	6.5	9.6	0.3	0
	2545.79	2677.7			2.5	0	1.8	1	11.2	6.2	0.1	0
	2547.05	2681.68			0.9	0	4	1.4	7.4	10.6	2.1	0
	2549.61	2691.57			0.5	0	1.4	1.7	9.8	6.7	0	0.9
	2571.62	2711.74			0	1.7	0.9	2.2	14.3	4.4	0	0.2
	2578.21	2727.69			0	0	2.1	2.3	8.6	7.4	0	1.3
	2595.86	2754.13			0.5	0	2	1.7	4.3	8.3	0	0.7
	2596.06	2762.93			1.6	2	1.4	1.8	7.1	8.1	0	1.5
	2598	2772.81			0.5	1.7	1.9	1.6	5.7	4.2	0	1.9
	2611.37	2778.13			0	0	2.2	1.4	6.7		0.1	0
	2633.91	2811.57			0.1	2	1.9	1.2	3.8		4.4	1.1
	2636.65	2831.92			2.2	4.6	2.4	1.4	5.5		0	2.3
	2648.7	2833.91			0	4.3	2.1	1.7	11.5		1.7	2.8
	2651.05	2865.75			0.8	0	1.6	1.5	6.1		0.2	1.5
	2660.5	2869.59			0	3.2	1.5	1.3	3.4		1.3	1.3
	2662.79	2894.35			1.9	1.4		0.9	10		2.1
	2667.05	2903.35			0	0.4		1.1	10.2		0
	2667.63	2919.74			1.9			1.5	0.7		0
	2675.1	2954.61			1.7			1.6	8.2		0.4
	2675.54	2979.1			0			0.9	5.9		1.8
	2682.57	3006.7			0				6.9		0
	2690.57	3017.97							6.9		0.4
	2691.61	3024.02							3.6		0
	2706.05	3031.3									0
	2707.41	3038.48
	2709.35	3059.5
	2710.28	3067.63
	2714.65	3077.34
	2716.28	3113.64
	2719.68	3119.31
	2735.03	3121.91
	2743.72	3146.63
	2747.68	3147.12
	2749.5	3164.55
	2750.08	3179.06
	2757.04	3186.88
	2757.68	3199.21
	2760.61	3225.17
	2778.67	3241.61
	2779.89	3298.97
	2787.76	3316.71
	2804.19	3418.14
	2811.73	3425.23
	2812.65	3438.17
	2818.48	3593.92
	2871.61	3634.08
Statistics	2-tailed t-test
	Groups compared	P-value
	Day 5 and Day 6	1.32301e-09	*
