# Supplementary material for: Circuit mechanisms encoding odors and driving aging-associated behavioral declines in Caenorhabditis elegans
Source: eLife. 2015 Sep 22;4:e10181. doi: 10.7554/eLife.10181 (PMC4577979; doi:10.7554/eLife.10181)
Supplement: Figure 5—source data 3. — DOI: http://dx.doi.org/10.7554/eLife.10181.020 [file elife10181s010.xlsx]

## Sheet: Sheet1
Figure 5–figure supplement 2 Source data
Figure 5–figure supplement 2D
Neuron	ASEL		AWB
Genotype	Wild-type		Wild-type
Age (Days of Adulthood)	5	5	5	5
Condition	BZ Side	Control Side	BZ Side	Control Side
n	28	26	28	28
# odor responsive (greater than 10% DF/F)	20	8	27	14
% odor responsive (greater than 10% DF/F)	71.4286	30.7692	96.4286	50
P-value (2-tailed Chi square test)	0.0028		8.7514e-05
Averaged DF/F after stimulus change (time window described in Methods and materials)	-6.8327	-53.857	-8.9834	-41.5631
	-2.3039	-16.4036	20.1375	-23.6537
	2.2506	-15.6771	48.8855	-21.675
	2.8114	-13.5179	74.6545	-17.8315
	3.4237	-10.3052	116.349	-13.6353
	3.7422	-7.4526	116.837	-10.911
	5.5541	-6.6313	132.692	-8.1911
	6.3014	-5.415	136.986	-7.162
	10.546	-2.8939	139.689	-6.7307
	15.2173	-2.8382	168.605	-4.2805
	15.6942	-2.492	171.29	-3.1933
	22.6068	-2.1088	189.823	-2.18
	24.5749	1.5139	208.471	-0.8848
	32.0483	2.2501	234.311	5.1802
	38.8143	2.9607	237.461	21.0077
	41.7782	5.4874	240.927	49.7851
	53.0325	5.6112	241.935	57.9437
	69.6816	8.3225	247.469	95.4014
	83.9567	13.8864	247.709	113.052
	90.8454	27.4049	262.693	134.08
	97.6299	45.6188	277.191	145.004
	162.645	64.3291	282.958	153.856
	172.984	70.6052	308.381	184.595
	198.634	78.5156	314.511	213.232
	203.829	79.1112	368.864	265.601
	217.907	112.801	452.627	281.49
	237.207		469.248	327.71
	276.06		533.106	370.517
