# Supplementary material for: Circuit mechanisms encoding odors and driving aging-associated behavioral declines in Caenorhabditis elegans
Source: eLife. 2015 Sep 22;4:e10181. doi: 10.7554/eLife.10181 (PMC4577979; doi:10.7554/eLife.10181)
Supplement: Figure 5—source data 4. — DOI: http://dx.doi.org/10.7554/eLife.10181.021 [file elife10181s011.xlsx]

## Sheet: Sheet1
Figure 5–figure supplement 3 Source data
Figure 5–figure supplement 3A							Figure 5–figure supplement 3D
Genotype	Wild-type						Neuron	AWA		ASH		ASEL		AWB
Age (Days of Adulthood)	1	2	3	4	5		Genotype	Wild-type		Wild-type		Wild-type		Wild-type
Average	-0.0467361	-0.0195011	0.0245607	0.00155314	0.0141314		Age (Days of Adulthood)	1	5	1	5	1	5	1	5
s.e.m.	0.0208559	0.0341383	0.0197231	0.020718	0.0167597		n	20	21	18	18	40	27	30	32
n	17	10	10	10	13		# odor responsive (greater than 10% DF/F)	14	14	10	12	39	24	30	29
							% odor responsive (greater than 10% DF/F)	70	66.6667	55.5556	66.6667	97.5	88.8889	100	90.625
Chemotaxis Index	0.0806452	-0.133333	0.0666667	0.172414	0.0277778		P-value (2-tailed Chi square test)	0.8187		0.4941		0.1445		0.0856
	-0.0714286	-0.0322581	0.05	-0.0344828	0.04
	-0.076087	0.0285714	-0.0333333	0	0.0377358		Averaged DF/F after stimulus change (time window described in Methods and materials)	-2.7605	-9.854	-4.6407	-7.2547	8.9465	-56.3891	11.9262	-20.5749
	-0.0392157	0.0217391	0.0384615	-0.0238095	0			-0.4818	-3.1414	3.046	-1.4784	14.0713	-18.5843	36.5428	-19.4348
	0.0540541	-0.0606061	0.114286	-0.0625	0.0666667			0.3661	-0.6701	3.3507	0.657	22.8973	5.0618	37.933	-0.6163
	-0.0714286	0	0.0882353	0	-0.0238095			3.6792	3.2584	3.581	2.6637	28.4847	6.7152	56.2261	141.781
	-0.0952381	-0.16129	-0.0625	0	-0.0588235			4.584	4.5825	4.6201	3.9072	30.3301	12.775	129.503	163.771
	0.0212766	0.227273	0.0606061	-0.030303	0.08			6.1067	5.502	5.5502	7.3608	30.9727	19.7597	152.031	181.79
	-0.0967742	0	-0.0465116	-0.037037	-0.0263158			11.6963	5.7214	7.4124	10.3761	31.6991	27.3971	153.016	197.413
	-0.241379	-0.0851064	-0.030303	0.03125	0.125			26.3188	14.6976	9.9514	10.5408	32.3065	35.087	214.446	200.73
	-0.149254				0.0333333			26.5877	16.8842	11.2743	11.3201	35.9644	38.0937	219.884	204.912
	0.0694444				-0.0178571			35.8216	22.5368	12.3992	13.3132	36.2598	43.5534	226.359	213.44
	-0.037037				-0.1			38.5496	28.6045	12.7518	30.5987	37.8961	47.4504	249.748	217.42
	-0.0357143							40.7416	29.6317	12.7949	32.7744	39.6221	56.1636	261.348	225.69
	-0.144144							41.1651	30.7089	18.253	57.6987	40.156	56.7226	266.1	251.612
	0.0258621							42.3873	34.3929	31.7589	69.3144	40.2372	64.5137	274.247	265.591
	0.0119048							49.4093	48.1887	50.1177	92.6774	41.1674	65.587	289.65	269.072
								54.346	49.0813	71.9586	162.516	41.7316	76.0019	289.707	284.155
								66.1209	57.4441	89.9258	238.291	44.0278	81.3527	291.694	286.49
Statistics	2-tailed t-test, with Bonferroni correction							69.6304	113.499	109.753	367.672	46.2368	83.1874	312.546	300.27
	Groups Compared			P-value				79.7557	114.632			46.3227	92.1972	337.533	305.639
	Day 2 compared to Day 1			0.505896	NS			84.3227	158.836			46.6023	107.453	393.275	316.789
	Day 3 compared to Day 1			0.0204735	NS				165.809			48.7306	110.135	412.91	339.566
	Day 4 compared to Day 1			0.113987	NS							50.6682	118.078	416.268	342.827
	Day 5 compared to Day 1			0.0308075	NS							52.1885	122.338	418.468	351.465
												54.745	125.373	426.375	358.829
												58.0595	136.143	465.53	363.017
												60.6584	209.769	476.298	368.799
												70.7267	229.426	483.901	378.132
												73.3905		502.397	400.44
												73.8849		622.754	510.668
												75.7207		669.043	522.799
												77.4001			547.238
												80.4046			653.063
												86.1303
												93.764
												96.7275
												97.0034
												99.6487
												129.539
												179.759
												184.26
