# Supplementary material for: Circuit mechanisms encoding odors and driving aging-associated behavioral declines in Caenorhabditis elegans
Source: eLife. 2015 Sep 22;4:e10181. doi: 10.7554/eLife.10181 (PMC4577979; doi:10.7554/eLife.10181)
Supplement: Figure 5—source data 5. — DOI: http://dx.doi.org/10.7554/eLife.10181.022 [file elife10181s012.xlsx]

## Sheet: Sheet1
Figure 5–figure supplement 4 Source data
Figure 5–figure supplement 4A				Figure 5–figure supplement 4C				Figure 5–figure supplement 4F
Genotype	Wild-type			Genotype	Wild-type			Neuron	AWCON
Age (Days of Adulthood)	1	5		Age (Days of Adulthood)	1	5		Genotype	Wild-type
Average	0.358743	0.466085		Average	-0.581931	-0.525001		Age (Days of Adulthood)	1	5
s.e.m.	0.0721642	0.0935213		s.e.m.	0.0284222	0.0571623		n	22	22
n	9	9		n	11	9		# salt responsive (greater than 10% DF/F)	22	21
								% salt responsive (greater than 10% DF/F)	100	95.4545
Chemotaxis Index	0.263158	0.3		Chemotaxis Index	-0.583333	-0.288889		P-value (2-tailed Chi square test)	0.3117
	0.132075	0.529412			-0.652174	-0.211538
	0.395349	0.75			-0.653846	-0.680851		Averaged DF/F after salt addition	197.884	74.2843
	0.243243	0.14			-0.69697	-0.631579			142.614	33.4242
	0.148148	0.3			-0.685185	-0.555556			162.885	360.626
	0.173913	0.027027			-0.622951	-0.548387			150.351	238.176
	0.586957	0.671053			-0.547619	-0.682927			213.541	393.492
	0.704762	0.75			-0.419643	-0.472222			148.025	159.977
	0.581081	0.727273			-0.574713	-0.653061			250.052	127.418
					-0.536232				213.709	169.393
					-0.428571				152.539	118.717
									278.684	274.12
Statistics	2-tailed t-test				2-tailed t-test				163.719	156.433
	Groups compared	P-value			Groups compared	P-value			51.0135	253.383
	Day 1 and Day 5	0.377845	NS		Day 1 and Day 5	0.390241	NS		76.8716	173.452
									89.6154	332.534
									121.862	294.531
									196.298	232.623
									123.846	240.799
									325.625	145.511
									79.176	270.241
									152.368	295.018
									152.352	31.0539
									73.2934	1.4599
