# Supplementary material for: Circuit mechanisms encoding odors and driving aging-associated behavioral declines in Caenorhabditis elegans
Source: eLife. 2015 Sep 22;4:e10181. doi: 10.7554/eLife.10181 (PMC4577979; doi:10.7554/eLife.10181)
Supplement: Figure 5—source data 6. — DOI: http://dx.doi.org/10.7554/eLife.10181.023 [file elife10181s013.xlsx]

## Sheet: Sheet1
Figure 5–figure supplement 5 Source data
Figure 5–figure supplement 5E					Figure 5–figure supplement 5F					Figure 5–figure supplement 5G					Figure 5–figure supplement 5H					Figure 5–figure supplement 5I
Neuron	ASEL				Neuron	AWB				Neuron	ASEL				Neuron	AWB				Genotype	Wild-type		glp-1
Genotype	WT	glp-1	aak-2(gf)		Genotype	WT	glp-1	aak-2(gf)		Genotype	Control	rab-10 RNAi	hsf-1 RNAi		Genotype	Control	rab-10 RNAi	hsf-1 RNAi		Age (Days of Adulthood)	1	5	1	5
Age (Days of Adulthood)	5	5	5		Age (Days of Adulthood)	5	5	5		Age (Days of Adulthood)	5	5	5		Age (Days of Adulthood)	5	5	5		Average	0.525993	0.153638	0.570918	0.222794
n	21	18	15		n	22	18	15		n	18	18	18		n	19	18	18		s.e.m.	0.0561787	0.0530092	0.0723352	0.0575536
# odor responsive (greater than 10% DF/F)	10	7	8		# odor responsive (greater than 10% DF/F)	17	11	10		# odor responsive (greater than 10% DF/F)	12	9	11		# odor responsive (greater than 10% DF/F)	15	14	13		n	9	10	9	9
% odor responsive (greater than 10% DF/F)	47.619	38.8889	53.3333		% odor responsive (greater than 10% DF/F)	77.2727	61.1111	66.6667		% odor responsive (greater than 10% DF/F)	66.6667	50	61.1111		% odor responsive (greater than 10% DF/F)	78.9474	77.7778	72.2222
P-value (2-tailed Chi square test compared to WT)	-	0.5836	0.7353		P-value (2-tailed Chi square test compared to WT)	-	0.2671	0.4757		P-value (2-tailed Chi square test compared to control)	-	0.3105	0.7286		P-value (2-tailed Chi square test compared to control)	-	0.9312	0.6337		Chemotaxis Index	0.54	0.25	0.722222	0.368421
																					0.655914	0.0222222	0.659341	0.447368
Averaged DF/F after odor removal	18.9153	6.3086	-1.1987		Averaged DF/F after odor removal	191.815	57.8363	28.7451		Averaged DF/F after odor removal	98.1494	40.6166	0.1683		Averaged DF/F after odor removal	57.8714	129.539	248.145			0.691358	0.105263	0.557692	0.142857
	7.6114	115.748	63.0357			214.827	1.588	110.373			202.482	-7.0237	110.958			67.8277	2.3549	0.5622			0.2	-0.134615	0.265306	0.285714
	-10.886	99.0249	2.9342			26.2407	116.015	34.6045			18.6815	142.361	131.609			-8.2452	-5.3932	171.758			0.352941	0.442105	0.290323	0.0307692
	28.7752	-0.9139	-2.9269			34.4987	53.9616	6.9667			33.0596	-0.1071	-5.3684			309.242	396.535	129.435			0.428571	0.0204082	0.340426	-0.0888889
	17.1439	-12.648	-2.2496			-22.6713	2.6458	13.7796			27.0492	97.5451	112.159			20.2627	94.124	60.7178			0.570248	0.333333	0.822222	0.255814
	2.754	2.3493	34.1438			41.5816	38.304	5.6059			42.9099	4.5038	60.7184			594.891	203.636	476.063			0.700565	0.1875	0.738462	0.366667
	28.1655	3.8918	4.0899			113.224	-6.4308	11.3914			-0.3485	107.197	88.1546			176.983	-52.2863	171.583			0.59434	0.212121	0.742268	0.196429
	-2.6086	-3.7525	63.1152			159.576	11.2153	16.4889			5.7458	32.9941	2.9779			-48.3664	109.05	-3.8336				0.0980392
	-1.6295	33.256	38.6346			151.316	0.6247	213.771			1.2574	2.123	223.881			230.948	149.354	5.0854
	10.4395	98.9565	11.1684			14.7915	-8.886	94.7492			74.8264	134.893	45.9237			-7.0585	27.2893	24.9265		Statistics	2-tailed t-test, with Bonferroni correction
	3.2977	24.5334	34.62			193.46	42.4968	3.7865			81.496	4.098	-8.5544			292.774	291.922	-2.2535			Groups compared		P-value
	-2.3708	2.1609	-4.3854			8.9162	-10.6212	-6.612			-1.3011	2.091	189.206			301.227	102.153	-24.3576			WT Young and glp-1 Young		0.630836	NS
	-7.4863	84.082	155.633			-6.1154	71.4677	9.3439			46.5391	20.2137	121.987			241.985	291.015	259.201			WT Aged and glp-1 Aged		0.389353	NS
	129.417	62.8182	1.7144			-1.4639	118.662	320.171			52.8533	-15.6915	-5.4125			-17.4059	444.556	354.975
	162.802	15.0415	22.0875			217.011	100.134	167.227			-6.1674	80.5902	-12.7238			959.074	371.32	375.74
	69.8623	4.2597				-10.5119	266.242				7.6766	-0.6211	-1.4296			667.372	-0.2383	234.32
	-0.1596	-15.5061				287.609	218.551				245.801	10.0611	82.1247			17.7283	223.955	254.458
	14.8356	-16.373				233.441	9.9373				125.803	0.2887	84.4688			42.2601	208.861	187.636
	8.2729					103.16										65.8568
	-1.3742					15.2885
	16.8013					60.5696
						16.2766
