# Supplementary material for: Circuit mechanisms encoding odors and driving aging-associated behavioral declines in Caenorhabditis elegans
Source: eLife. 2015 Sep 22;4:e10181. doi: 10.7554/eLife.10181 (PMC4577979; doi:10.7554/eLife.10181)
Supplement: Figure 6—source data 1. — DOI: http://dx.doi.org/10.7554/eLife.10181.030 [file elife10181s014.xlsx]

## Sheet: Sheet1
Figure 6-Source Data
Figure 6F						Figure 6G
Neuron	ASEL					Genotype	Wild-type		ASE(-)		AWC::tom-1 RNAi		ASE(-); AWC::tom-1 RNAi
Genotype	Wild-type	AWC::daf-2 (OE)	AWC::ins-1 (OE)	AWC::tom-1 RNAi		Age (Days of Adulthood)	1	5	1	5	1	5	1	5
Age (Days of Adulthood)	5	5	5	5		Average	0.562437	0.156962	0.127142	0.260424	0.576957	0.491513	0.204321	0.247286
n	42	21	27	27		s.e.m.	0.0295995	0.0408717	0.0805737	0.0415446	0.0235681	0.0644219	0.0621245	0.0386844
# odor responsive (greater than 10% DF/F)	20	11	21	20		n	23	16	9	9	10	11	9	10
% odor responsive (greater than 10% DF/F)	47.619	52.381	77.7778	74.0741
P-value, compared to WT (2-tailed Chi square test)	-	0.7215	0.0128	0.0298		Chemotaxis Index	0.25	0.442105	-0.146341	0.16129	0.545455	0.7	0.0679612	0.393939
							0.297297	0.0204082	0.232558	0.05	0.612903	0.736842	0.0246914	0.242424
Averaged DF/F after stimulus change (time window described in Methods and materials)	-45.559	-36.7939	-23.2512	-7.9465			0.333333	0.333333	0.448276	0.488889	0.5	0.46875	0.121212	0.358974
	-43.2948	-21.4834	-14.7704	-3.7553			0.394737	0.25	-0.285714	0.363636	0.563636	0.125	0.205882	0.294118
	-29.3004	-8.7316	-11.732	0.7771			0.473684	0.0222222	0.0882353	0.25641	0.609375	0.45122	0.316667	0.0645161
	-20.1526	-6.9975	-5.797	0.7927			0.48	0.105263	0.0707965	0.3	0.649123	0.602564	-0.0425532	0.212766
	-17.9638	-3.3392	-1.7083	2.1863			0.54717	-0.134615	0.30137	0.225806	0.705882	0.862069	0.550725	0.354839
	-14.8952	-1.7237	-0.8771	4.4911			0.548387	0.1875	0.0493827	0.295082	0.529412	0.325581	0.228916	0.166667
	-14.7513	0.2756	11.7678	7.4869			0.558559	0.212121	0.385714	0.202703	0.45122	0.357143	0.365385	0.333333
	-13.7234	1.404	14.2435	11.401			0.564706	0.0980392			0.602564	0.392857		0.0512821
	-13.2377	1.738	29.6988	25.8823			0.570248	0.25				0.384615
	-12.3886	6.5987	32.6539	26.2054			0.59434	0.220339
	-9.4858	10.9802	36.506	26.4184			0.595238	0.0434783
	-8.0705	11.0838	41.6795	28.8386			0.59596	-0.104167
	-6.3041	49.4919	51.8123	29.9859			0.613208	0.388889
	-6.25	50.0662	51.9451	34.8077			0.625	0.176471
	-5.7186	59.4833	54.1501	36.6229			0.626667
	-4.2479	64.3238	76.0807	44.8319			0.652174
	-2.9889	65.7529	77.5368	58.8482			0.666667
	-1.1405	73.5968	78.1467	70.1767			0.685185
	0.9032	88.7608	82.8257	72.5456			0.689922
	3.3167	91.6804	95.16	74.7271			0.700565
	4.1349	205.02	101.06	78.5923			0.873016
	7.8146		105.103	80.1085
	12.2665		116.051	108.715		Statistics	2-tailed t-test, with Bonferroni correction
	13.0043		118.55	163.842			Groups compared				P-value
	13.3032		120.656	171.735			Wild-type Day 1 vs. Day 5				6.7109e-09	*
	30.799		131.383	198.631			ASE(-) Day 1 vs. Day 5				0.167283	NS
	34.8381		198.929	310.781			AWC::tom-1 RNAi Day 1 vs. Day 5				0.235574	NS
	37.9455						ASE(-); AWC::tom-1 RNAi Day 1 vs. Day 5				0.566774	NS
	38.1803						Wild-type day 5 vs. ASE(-) day 5				0.0905852	NS
	39.0476						Wild-type day 5 vs. AWC::tom-1 RNAi day 5				0.00036781	*
	41.5377						Wild-type day 5 vs. ASE(-); AWC::tom-1 RNAi day 5				0.122096	NS
	48.8133						ASE(-); AWC::tom-1 RNAi day 5 vs. AWC::tom-1 RNAi day 5				0.00496224	*
	54.1955
	72.7231
	80.2656
	99.3709
	137.306
	143.014
	150.985
	202.425
	301.726
	525.336
