# Supplementary material for: Circuit mechanisms encoding odors and driving aging-associated behavioral declines in Caenorhabditis elegans
Source: eLife. 2015 Sep 22;4:e10181. doi: 10.7554/eLife.10181 (PMC4577979; doi:10.7554/eLife.10181)
Supplement: Figure 6—source data 2. — DOI: http://dx.doi.org/10.7554/eLife.10181.031 [file elife10181s015.xlsx]

## Sheet: Sheet1
Figure 6-figure supplement 1 Source Data
Figure 6-figure supplement 1B										Figure 6-figure supplement 1C						Figure 6-figure supplement 1D
Neuron	ASEL									Neuron	ASEL					Genotype	Wild-type		AWC::ins-1(OE)
Genotype	Wild-type	AWC::tom-1 RNAi	AWC::ins-1 (OE)	AWC::daf-2 (OE)	Wild-type	AWC::tom-1 RNAi	AWC::ins-1 (OE)	AWC::daf-2 (OE)		Genotype	Wild-type	AWC::tom-1 RNAi	AWC::ins-1 (OE)	AWC::daf-2 (OE)		Age (Days of Adulthood)	1	5	1	5
Age (Days of Adulthood)	1	1	1	1	5	5	5	5		Age (Days of Adulthood)	1	1	1	1		Average	0.544359	0.189747	0.451994	0.0746682
n	30	17	18	14	42	27	27	21		n	30	17	18	14		s.e.m.	0.0333414	0.0314274	0.0437948	0.0562002
P-value (two-tailed t-test including odor responsive traces only, compared to age-matched wild-type, with Bonferroni)	-	0.423867	0.0442299	0.000352126	-	0.517733	0.377276	0.295996		# odor responsive (greater than 10% DF/F)	29	14	15	14		n	14	15	9	10
				*						% odor responsive (greater than 10% DF/F)	96.6667	82.3529	83.3333	100
										P-value, compared to WT (2-tailed Chi square test)	-	0.1518	0.1707	0.4895		Chemotaxis Index	0.625	0.295455	0.416667	0.153846
Averaged DF/F after odor removal	-3.5086	5.0578	-21.3118	37.3609	-45.559	-7.9465	-23.2512	-36.7939									0.652174	0.0769231	0.287671	-0.160714
	11.3374	6.6647	2.7265	55.1351	-43.2948	-3.7553	-14.7704	-21.4834		Averaged DF/F after odor removal	-3.5086	5.0578	-21.3118	37.3609			0.564706	0.193548	0.338028	-0.102941
	11.6535	9.9727	9.9918	60.5017	-29.3004	0.7771	-11.732	-8.7316			11.3374	6.6647	2.7265	55.1351			0.666667	0.295082	0.594203	-0.105263
	13.8247	17.1139	15.4027	64.1234	-20.1526	0.7927	-5.797	-6.9975			11.6535	9.9727	9.9918	60.5017			0.59596	0.195652	0.708738	0.0714286
	17.0875	19.3695	17.4539	64.6492	-17.9638	2.1863	-1.7083	-3.3392			13.8247	17.1139	15.4027	64.1234			0.558559	0.290323	0.350515	0.361111
	17.1659	20.9821	25.3924	67.2786	-14.8952	4.4911	-0.8771	-1.7237			17.0875	19.3695	17.4539	64.6492			0.548387	0.285714	0.454545	0.0681818
	20.2539	24.0257	43.1747	69.3583	-14.7513	7.4869	11.7678	0.2756			17.1659	20.9821	25.3924	67.2786			0.626667	0.169492	0.446154	0.268657
	25.0187	43.534	47.1925	74.6083	-13.7234	11.401	14.2435	1.404			20.2539	24.0257	43.1747	69.3583			0.54717	0.205128	0.471429	-0.0416667
	32.8242	48.3823	51.2452	86.7887	-13.2377	25.8823	29.6988	1.738			25.0187	43.534	47.1925	74.6083			0.613208	0.15		0.234043
	33.1283	56.1277	68.7187	93.8464	-12.3886	26.2054	32.6539	6.5987			32.8242	48.3823	51.2452	86.7887			0.595238	-0.104167
	36.6677	59.7523	71.9185	105.658	-9.4858	26.4184	36.506	10.9802			33.1283	56.1277	68.7187	93.8464			0.297297	0.388889
	36.9164	60.0599	74.9825	110.436	-8.0705	28.8386	41.6795	11.0838			36.6677	59.7523	71.9185	105.658			0.48	0.0434783
	38.7845	60.7686	77.0511	122.188	-6.3041	29.9859	51.8123	49.4919			36.9164	60.0599	74.9825	110.436			0.25	0.140351
	40.2868	68.8105	85.0224	133.114	-6.25	34.8077	51.9451	50.0662			38.7845	60.7686	77.0511	122.188				0.220339
	41.1174	71.3296	88.434		-5.7186	36.6229	54.1501	59.4833			40.2868	68.8105	85.0224	133.114
	43.4178	83.5589	92.9149		-4.2479	44.8319	76.0807	64.3238			41.1174	71.3296	88.434
	43.4892	90.6234	97.812		-2.9889	58.8482	77.5368	65.7529			43.4178	83.5589	92.9149
	43.5642		104.243		-1.1405	70.1767	78.1467	73.5968			43.4892	90.6234	97.812
	44.9385				0.9032	72.5456	82.8257	88.7608			43.5642		104.243
	45.1083				3.3167	74.7271	95.16	91.6804			44.9385					Statistics	2-tailed t-test, with Bonferroni correction
	56.4959				4.1349	78.5923	101.06	205.02			45.1083						Groups compared				P-value
	57.0421				7.8146	80.1085	105.103				56.4959						Wild-type Day 1 compared to Day 5				2.69394e-08	*
	57.1645				12.2665	108.715	116.051				57.0421						AWC::ins-1 (OE) Day 1 compared to Day 5				6.6312e-05	*
	62.5662				13.0043	163.842	118.55				57.1645						AWC::ins-1 (OE) Day 1 compared to WT Day 1				0.112123	NS
	64.6593				13.3032	171.735	120.656				62.5662						AWC::ins-1 (OE) Day 5 compared to WT Day 5				0.0946896	NS
	64.8255				30.799	198.631	131.383				64.6593
	70.2873				34.8381	310.781	198.929				64.8255
	71.4579				37.9455						70.2873
	88.223				38.1803						71.4579
	125.089				39.0476						88.223
					41.5377						125.089
					48.8133
					54.1955
					72.7231
					80.2656
					99.3709
					137.306
					143.014
					150.985
					202.425
					301.726
					525.336
