# Supplementary material for: Circuit mechanisms encoding odors and driving aging-associated behavioral declines in Caenorhabditis elegans
Source: eLife. 2015 Sep 22;4:e10181. doi: 10.7554/eLife.10181 (PMC4577979; doi:10.7554/eLife.10181)
Supplement: Figure 7—source data 1. — DOI: http://dx.doi.org/10.7554/eLife.10181.034 [file elife10181s016.xlsx]

## Sheet: Sheet1
Figure 7-Source Data
Figure 7E					Figure 7F
Neuron	AWB				Genotype	Wild-type		AWB(-)		AWA::unc-17(OE)		AWB(-); AWA::unc-17(OE)
Genotype	Wild-type	AWA::unc-17 (OE)	WT + arecoline		Age (Days of Adulthood)	1	5	1	5	1	5	1	5
Age (Days of Adulthood)	5	5	5		Average	0.562437	0.156962	0.309148	0.192553	0.637328	0.452922	0.188861	0.284012
n	31	24	27		s.e.m.	0.0295995	0.0408717	0.058317	0.0827617	0.0203666	0.0611126	0.0736536	0.0394693
# odor responsive (greater than 10% DF/F)	21	22	27		n	23	16	9	9	10	11	9	10
% odor responsive (greater than 10% DF/F)	67.7419	91.6667	100
P-value, compared to WT (2-tailed Chi square test)	-	0.0331	0.0012		Chemotaxis Index	0.25	0.442105	-0.0759494	0.238806	0.588235	0.230769	0.322581	0.325581
						0.297297	0.0204082	0.288889	0.466667	0.661765	0.652174	0.322581	0.468085
Averaged DF/F after stimulus change (time window described in Methods and materials)	-24.1348	-10.1842	27.0289			0.333333	0.333333	0.521739	-0.28125	0.585366	0.666667	-0.208333	0.309524
	-10.2374	6.3701	59.7108			0.394737	0.25	0.522388	0.193548	0.631579	0.512821	-0.166667	0.0545455
	-4.6153	18.4712	83.9886			0.473684	0.0222222	0.279412	-0.0625	0.643836	0.075	0.157895	0.214286
	-3.8443	97.145	87.7637			0.48	0.105263	0.328947	0.5	0.743243	0.534653	0.30303	0.162791
	-2.0022	145.989	110.677			0.54717	-0.134615	0.26	0.0882353	0.685185	0.609756	0.333333	0.282609
	-1.0876	149.551	114.611			0.548387	0.1875	0.305556	0.289474	0.709677	0.507692	0.353846	0.270833
	-0.6308	156.57	117.924			0.558559	0.212121	0.351351	0.3	0.589744	0.634921	0.281481	0.461538
	0.5235	156.673	125.53			0.564706	0.0980392			0.534653	0.307692		0.290323
	5.3244	167.607	134.269			0.570248	0.25				0.25
	6.1104	190.055	135.113			0.59434	0.220339
	13.4018	271.274	141.354			0.595238	0.0434783
	15.2885	279.882	145.028			0.59596	-0.104167
	16.2766	291.127	152.15			0.613208	0.388889
	54.5128	309.557	171.313			0.625	0.176471
	60.5696	311.682	177.417			0.626667
	71.7183	321.178	194.621			0.652174
	81.5279	329.52	223.212			0.666667
	87.338	329.816	246.202			0.685185
	87.7884	371.434	251.03			0.689922
	90.9897	391.533	271.011			0.700565
	97.2588	393.388	276.699			0.873016
	103.16	396.452	306.882
	105.852	399.434	311.377
	112.592	555.82	317.576
	125.953		348.21
	188.53		354.509
	191.102		408.758
	209.755
	233.441
	241.412
	260.044
