# Supplementary material for: Circuit mechanisms encoding odors and driving aging-associated behavioral declines in Caenorhabditis elegans
Source: eLife. 2015 Sep 22;4:e10181. doi: 10.7554/eLife.10181 (PMC4577979; doi:10.7554/eLife.10181)
Supplement: Figure 7—source data 2. — DOI: http://dx.doi.org/10.7554/eLife.10181.035 [file elife10181s017.xlsx]

## Sheet: Sheet1
Figure 7-figure supplement 1 Source Data
Figure 7-figure supplement 1B								Figure 7-figure supplement 1C					Figure 7-figure supplement 1D
Neuron	AWB							Neuron	AWB				Genotype	Wild-type		WT + arecoline
Genotype	Wild-type	AWA::unc-17(OE)	WT + arecoline	Wild-type	AWA::unc-17(OE)	WT + arecoline		Genotype	Wild-type	AWA::unc-17(OE)	WT + arecoline		Age (Days of Adulthood)	1	5	1	5
Age (Days of Adulthood)	1	1	1	5	5	5		Age (Days of Adulthood)	1	1	1		Average	0.604468	0.139242	0.346598	0.0122045
n	30	19	17	31	24	27		n	30	19	17		s.e.m.	0.0171539	0.0503307	0.0465186	0.0532357
P-value (two-tailed t-test including odor responsive traces only, compared to age-matched wild-type)	-	0.75093	0.0901662	-	1.62156e-05	0.00309069		# odor responsive (greater than 10% DF/F)	30	19	16		n	6	6	6	6
		NS	NS		*	*		% odor responsive (greater than 10% DF/F)	100	100	94.1176
								P-value, compared to WT (2-tailed Chi square test)	-	1	0.1793		Chemotaxis Index	0.633663	0.0227273	0.4	-0.1
Averaged DF/F after odor removal	13.7	39.3232	1.781	-24.1348	-10.1842	27.0289								0.61194	0.170213	0.287671	-0.0740741
	32.5	49.6798	22.7488	-10.2374	6.3701	59.7108		Averaged DF/F after odor removal	13.7	39.3232	1.781			0.662651	0.0566038	0.478873	0.03125
	34.1	55.3124	29.4431	-4.6153	18.4712	83.9886			32.5	49.6798	22.7488			0.549451	0.297872	0.193548	0.21875
	38.2	74.4124	65.1472	-3.8443	97.145	87.7637			34.1	55.3124	29.4431			0.603448	0.0227273	0.266667	0.102564
	53.3	86.7267	72.5185	-2.0022	145.989	110.677			38.2	74.4124	65.1472			0.565657	0.265306	0.45283	-0.105263
	57.5	103.839	77.1043	-1.0876	149.551	114.611			53.3	86.7267	72.5185
	65.3	104.492	78.4279	-0.6308	156.57	117.924			57.5	103.839	77.1043
	69.9	115.13	79.9076	0.5235	156.673	125.53			65.3	104.492	78.4279
	77.3	120.516	79.9901	5.3244	167.607	134.269			69.9	115.13	79.9076
	83	169.931	87.487	6.1104	190.055	135.113			77.3	120.516	79.9901
	92.6	182.132	114.169	13.4018	271.274	141.354			83	169.931	87.487		Statistics	2-tailed t-test, with Bonferroni correction
	96.5	197.12	135.713	15.2885	279.882	145.028			92.6	182.132	114.169			Groups compared				P-value
	103.1	203.847	150.655	16.2766	291.127	152.15			96.5	197.12	135.713			Untreated Day 1 compared to Untreated Day 5				0.00010802	*
	113.6	214.759	166.053	54.5128	309.557	171.313			103.1	203.847	150.655			Arecoline treated Day 1 compared to Arecoline Day 5				0.000844493	*
	129.3	223.165	189.163	60.5696	311.682	177.417			113.6	214.759	166.053			Arecoline treated Day 1 compared to Untreated Day 1				0.001705	*
	145.1	229.981	216.267	71.7183	321.178	194.621			129.3	223.165	189.163			Arecoline treated Day 5 compared to Untreated Day 5				0.11367	NS
	152.9	238.05	279.508	81.5279	329.52	223.212			145.1	229.981	216.267
	162.7	257.127		87.338	329.816	246.202			152.9	238.05	279.508
	173.4	272.051		87.7884	371.434	251.03			162.7	257.127
	178			90.9897	391.533	271.011			173.4	272.051
	202.8			97.2588	393.388	276.699			178
	212.9			103.16	396.452	306.882			202.8
	216.6			105.852	399.434	311.377			212.9
	258.1			112.592	555.82	317.576			216.6
	270.9			125.953		348.21			258.1
	317.4			188.53		354.509			270.9
	331.5			191.102		408.758			317.4
	355.2			209.755					331.5
	415.6			233.441					355.2
	451.3			241.412					415.6
				260.044					451.3
