# Supplementary material for: Circuit mechanisms encoding odors and driving aging-associated behavioral declines in Caenorhabditis elegans
Source: eLife. 2015 Sep 22;4:e10181. doi: 10.7554/eLife.10181 (PMC4577979; doi:10.7554/eLife.10181)
Supplement: Figure 8—source data 1. — DOI: http://dx.doi.org/10.7554/eLife.10181.038 [file elife10181s018.xlsx]

## Sheet: Sheet1
Figure 8-Source Data
Figure 8B								Figure 8C								Figure 8D								Figure 8E
	Set A		Set B		Set C				Set A		Set B		Set C				Set 1		Set 2		Set 3				Set 1		Set 2			Set 3			Set 4
Wild-type	% alive		% alive		% alive			Wild-type	% alive		% alive		% alive				% alive		% alive		% alive				% alive		% alive			% alive			% alive
Days of Adulthood	BZ Odor Side	Control Side	BZ Odor Side	Control Side	BZ Odor Side	Control Side		Days of Adulthood	BZ Odor Side	Control Side	BZ Odor Side	Control Side	BZ Odor Side	Control Side		Days of Adulthood	Wild-type	AWA::unc-17(OE)	Wild-type	AWA::unc-17(OE)	Wild-type	AWA::unc-17(OE)		Days of Adulthood	Wild-type	AWC::tom-1 RNAi	Wild-type	AWC::tom-1 RNAi	AWC::ins-1(OE)	Wild-type	AWC::tom-1 RNAi	AWC::ins-1(OE)	Wild-type	AWC::ins-1(OE)
5	100	100	100	100	100	100		1	100	100	100	100	100	100		1	100	100	100	100	100	100		1	100	100	100	100	100	100	100	100	100	100
7	98.9247	100	100	98.9899	100	97.8723		3	100	100	100	100	100	100		3	96.5909	99	100	100	100	100		3	96.5909	100	100	100	100	100	100	100	100	100
9	98.8889	97.9167	98.9583	95.7447	98.9011	87.9121		5	100	100	100	100	97.8022	97.7273		5	96.4286	98.9796	96.4706	100	97.7273	100		5	96.4286	100	96.4706	100	100	97.7273	100	100	100	100
11	93.3333	80.8511	95.7447	86.9565	93.2584	75.5556		7	100	100	97.6744	100	95.5556	95.0617		7	96.25	97.8261	96.25	98.8764	95.2941	100		7	96.25	100	96.25	100	100	95.2941	97.2973	98.8372	98.8506	98.8372
13	78.8889	73.4043	91.3043	81.5217	87.6404	64.0449		9	94.186	93.9024	93.8272	93.1818	84.2697	87.1795		9	92.4051	94.4444	93.5897	96.5909	89.0244	96.25		9	92.4051	91.4634	93.5897	98.5294	97.4026	89.0244	90.625	97.619	92.8571	97.5309
15	67.4419	62.3656	82.9545	71.7391	76.4045	57.3034		11	89.5349	90.1235	86.25	84.8837	67.4157	76.6234		11	85.5263	89.5349	84.2105	89.2857	83.9506	85.8974		11	85.5263	82.2785	84.2105	92.4242	89.7059	83.9506	83.871	93.4211	86.5854	94.7368
17	54.2169	48.3871	74.4186	58.6957	65.9091	42.6966		13	81.9277	82.5	82.8947	78.5714	56.9767	63.1579		13	76	80	73.6842	82.716	75	80.2632		13	76	72.1519	73.6842	81.9672	83.0769	75	78.3333	84	77.7778	83.5616
19	44.5783	32.6087	59.7561	32.2222	52.8736	25.2874		15	74.3902	77.2152	73.3333	70.2381	41.9753	55.2632		15	66.6667	74.3902	65.3333	77.5	61.5385	75.3425		15	66.6667	60.7595	65.3333	68.3333	74.1935	61.5385	66.6667	77.1429	60.4938	74.2857
21	36.1446	18.4783	39.0244	17.7778	38.8235	13.9535		17	67.0886	67.0886	62.6667	62.1951	33.3333	35.5263		17	60.5634	73.1707	58.6667	70.8861	52.5641	70.5882		17	60.5634	53.2468	58.6667	52.5424	67.7966	52.5641	60.7143	68.1159	51.25	63.6364
23	22.8916	7.6087	17.284	2.22222	24.7059	6.97674		19	53.8462	53.8462	57.3333	57.3171	24.6914	23.6842		19	52.1739	68.75	54.6667	67.5325	43.5897	63.6364		19	52.1739	47.3684	54.6667	48.2759	60.7143	43.5897	48.2143	56.5217	43.75	55.3846
25	16.8675	5.43478	14.8148	1.11111	14.1176	0		21	44.8718	44.8718	34.6667	39.0244	23.4568	17.1053		21	42.029	62.0253	45.3333	63.6364	38.4615	57.8125		21	42.029	42.6667	45.3333	46.5517	49.0909	38.4615	39.2857	44.9275	34.1772	41.5385
27	12.0482	1.08696	9.87654	1.11111	9.41176	0		23	29.4872	28.2051	17.3333	20.7317	16.0494	11.8421		23	33.3333	58.2278	37.3333	58.4416	31.1688	52.381		23	33.3333	40	37.3333	41.3793	42.5926	31.1688	30.9091	36.7647	26.5823	30.7692
29	8.43373	0	7.40741	0	7.05882	0		25	12.8205	14.1026	10.6667	12.1951	7.40741	7.89474		25	20.2899	49.3671	24	54.5455	24.6753	42.8571		25	20.2899	30.6667	24	33.3333	33.3333	24.6753	25.4545	23.8806	12.6582	15.625
31	3.61446	0	4.93827	0	3.52941	0		27	7.69231	10.2564	5.33333	6.09756	4.93827	6.57895		27	14.4928	43.038	12	46.7532	15.5844	33.3333		27	14.4928	25.3333	12	28.0702	22.2222	15.5844	20	16.4179	5.06329	7.8125
33	2.40964	0	2.46914	0	2.35294	0		29	1.28205	3.84615	4	2.43902	1.23457	2.63158		29	7.24638	29.1139	5.33333	36.3636	7.79221	26.9841		29	7.24638	16	5.33333	17.5439	14.8148	7.79221	14.5455	10.4478	2.53165	3.125
35	0	0	1.23457	0	0	0		31	1.28205	1.28205	1.33333	1.21951	1.23457	1.31579		31	2.89855	24.0506	2.66667	32.4675	3.8961	22.2222		31	2.89855	9.33333	2.66667	15.7895	12.963	3.8961	10.9091	8.95522	0	0
37	0	0	1.23457	0	0	0		33	1.28205	1.28205	0	0	0	0		33	1.44928	17.7215	1.33333	24.6753	0	19.0476		33	1.44928	6.66667	1.33333	10.5263	11.1111	0	5.45455	5.97015	0	0
39	0	0	0	0	0	0		35	0	0	0	0	0	0		35	0	7.59494	0	15.5844	0	19.0476		35	0	4	0	7.01754	5.55556	0	1.81818	2.98507	0	0
								37	0	0	0	0	0	0		37	0	3.79747	0	7.79221	0	14.2857		37	0	1.33333	0	3.50877	1.85185	0	0	1.49254	0	0
								39	0	0	0	0	0	0		39	0	1.26582	0	6.49351	0	6.34921		39	0	0	0	1.75439	1.85185	0	0	1.49254	0	0
(Note: Statistics for Figure 8B listed in Figure 8-figure supplement 1)																41	0	0	0	2.5974	0	1.5873		41	0	0	0	0	0	0	0	0	0	0
																43	0	0	0	0	0	0		43	0	0	0	0	0	0	0	0	0	0
								(Note: Statistics for Figure 8C listed in Figure 8-figure supplement 1)
																(Note: Statistics for Figure 8D listed in Figure 8-figure supplement 3)								(Note: Statistics for Figure 8E listed in Figure 8-figure supplement 3)
