# Supplementary material for: Circuit mechanisms encoding odors and driving aging-associated behavioral declines in Caenorhabditis elegans
Source: eLife. 2015 Sep 22;4:e10181. doi: 10.7554/eLife.10181 (PMC4577979; doi:10.7554/eLife.10181)
Supplement: Figure 8—source data 2. — DOI: http://dx.doi.org/10.7554/eLife.10181.039 [file elife10181s019.xlsx]

## Sheet: Sheet1
Figure 8-figure supplement 2 Source Data
Figure 8-figure supplement 2A							Figure 8-figure supplement 2B
	Set A		Set B					Set 1		Set 2			Set 3
Wild-type	% alive		% alive					% alive		% alive			% alive
Days of Adulthood	Salt Side	Control Side	Salt Side	Control Side			Days of Adulthood	Wild-type	AWA::TeTX	Wild-type	AWA::TeTX	AWC::TeTX	Wild-type	AWC::TeTX
5	100	100	100	100			1	100	100	100	100	100	100	100
7	100	100	100	100			3	96.5909	100	100	100	100	100	100
9	100	97.7778	98.8764	97.7011			5	96.4286	98.9691	96.4706	100	100	97.7273	100
11	96.4706	93.1034	88.6364	87.9518			7	96.25	97.8022	96.25	100	98.7013	95.2941	98.5915
13	87.9518	86.9048	80.4598	74.3902			9	92.4051	94.3182	93.5897	98.8636	97.1831	89.0244	96.875
15	79.2683	78.5714	79.0698	63.75			11	85.5263	93.0233	84.2105	93.9024	89.8551	83.9506	92.9825
17	75.6098	71.9512	68.2353	55			13	76	86.9048	73.6842	88.75	83.8235	75	92.3077
19	65.4321	60.4938	48.2353	44.3038			15	66.6667	81.25	65.3333	85	77.4194	61.5385	89.1304
21	50.6173	47.5	34.1176	30.7692			17	60.5634	79.7468	58.6667	78.481	73.7705	52.5641	80
23	37.037	38.75	24.7059	24.359			19	52.1739	79.4872	54.6667	73.0769	72.1311	43.5897	69.7674
25	24.6914	23.75	14.1176	10.2564			21	42.029	73.0769	45.3333	69.7368	68.3333	38.4615	65.1163
27	16.0494	15	9.41176	5.12821			23	33.3333	69.2308	37.3333	65.7895	64.4068	31.1688	58.1395
29	9.87654	8.75	2.35294	2.5641			25	20.2899	57.6923	24	64.4737	54.2373	24.6753	41.8605
31	4.93827	2.5	1.17647	2.5641			27	14.4928	51.9481	12	61.8421	50.8475	15.5844	27.907
33	2.46914	0	1.17647	1.28205			29	7.24638	44.1558	5.33333	50.6667	37.2881	7.79221	16.2791
35	1.23457	0	0	0			31	2.89855	32.4675	2.66667	41.3333	30.5085	3.8961	13.9535
37	0	0	0	0			33	1.44928	25.974	1.33333	24	13.5593	0	11.6279
							35	0	16.8831	0	16	8.47458	0	4.65116
(Note: Statistics for Figure 8-figure supplement 2A listed in Figure 8-figure supplement 1)							37	0	10.3896	0	10.6667	3.38983	0	0
							39	0	3.8961	0	4	1.69492	0	0
							41	0	0	0	1.33333	0	0	0
							43	0	0	0	0	0	0	0
							(Note: Statistics for Figure 8-figure supplement 2B listed in Figure 8-figure supplement 3)
